# Supplementary material for: Pseudo-Symmetric Assembly of Protodomains as a Common Denominator in the Evolution of Polytopic Helical Membrane Proteins
Source: PubMed Central journal article supplement (PMC7162841; doi:10.1007/s00239-020-09934-4), 2020-03-18
Supplement: 239_2020_9934_MOESM2_ESM.pdf [file 239_2020_9934_MOESM2_ESM.pdf]

# ACHA7 TM2

TM2

|               | IC |   |   |   |   |   |   |   |   |   |   |   |   |   |   |   |   |   |   | EC |   |   |   |
|---------------|----|---|---|---|---|---|---|---|---|---|---|---|---|---|---|---|---|---|---|----|---|---|---|
| <i>P23979</i> | G  | E | R | V | S | F | K | I | T | L | L | L | G | Y | S | V | F | L | I | I  | V | S | D |
| <i>P28476</i> | P  | A | R | V | S | L | G | I | T | T | V | L | T | M | T | T | I | I | T | G  | V | N | A |
| <i>P24046</i> | P  | A | R | V | P | L | G | I | T | T | V | L | T | M | S | T | I | I | T | G  | V | N | A |
| <i>P26714</i> | S  | A | R | V | A | L | G | I | T | T | V | L | T | M | T | T | I | S | N | G  | V | R | S |
| <i>P19019</i> | A  | A | R | V | A | L | G | I | T | T | V | L | T | M | T | T | I | N | T | H  | L | R | E |
| <i>P24045</i> | A  | A | R | V | A | L | G | V | T | T | V | L | T | M | T | T | I | N | T | H  | L | R | E |
| <i>P08220</i> | A  | A | R | V | A | L | G | I | T | T | V | L | T | M | T | T | I | S | T | H  | L | R | E |
| <i>P25123</i> | P  | A | R | V | A | L | G | V | T | T | V | L | T | M | T | T | L | M | S | S  | T | N | A |
| <i>P22933</i> | P  | A | R | V | S | L | G | I | T | T | V | L | T | M | T | T | L | M | V | S  | A | R | S |
| <i>L8IEJ2</i> | P  | A | R | V | G | L | G | I | T | T | V | L | T | M | T | T | Q | S | G | S  | R | A |   |
| <i>P36544</i> | G  | E | K | I | S | L | G | I | T | V | L | L | S | L | T | V | F | M | L | L  | V | A | E |

# ACHA7 TM3

TM3

|               | EC |   | h |   | IC |   |   |   |   |   |   |   |   |   |   |   |   |   |   |   |   |   |   |   |   |
|---------------|----|---|---|---|----|---|---|---|---|---|---|---|---|---|---|---|---|---|---|---|---|---|---|---|---|
| <i>P23979</i> | I  | G | V | F | V  | C | M | L | L | V | I | S | L | A | E | T | I | F | I | V | R | L | V |   |   |
| <i>P28476</i> | V  | D | I | L | W  | S | F | V | F | V | L | S | V | L | E | Y | A | A | V | N | Y | L | T |   |   |
| <i>P24046</i> | V  | D | I | L | W  | S | F | V | F | V | L | S | V | L | E | Y | A | A | V | N | Y | L | T |   |   |
| <i>P26714</i> | I  | D | I | L | V  | M | C | F | V | F | V | F | A | L | L | E | Y | A | A | V | N | Y | T | Y |   |
| <i>P19019</i> | I  | D | M | Y | L  | M | G | C | F | V | F | V | L | A | L | L | E | Y | A | F | V | N | Y | I | F |
| <i>P24045</i> | I  | D | V | L | M  | G | C | F | V | F | V | L | A | L | L | E | Y | A | F | V | N | Y | I | F |   |
| <i>P08220</i> | I  | D | I | L | M  | G | C | F | V | F | V | L | A | L | L | E | Y | A | F | V | N | Y | I | F |   |
| <i>P25123</i> | I  | D | V | L | G  | T | C | F | V | M | V | F | A | S | L | L | E | Y | A | T | V | G | Y | M | A |
| <i>P22933</i> | L  | D | V | F | W  | I | C | Y | V | F | V | F | A | L | V | E | Y | A | F | A | H | F | N | A |   |
| <i>L8IEJ2</i> | I  | D | I | W | M  | A | V | C | L | L | F | V | S | A | L | L | E | Y | A | A | V | N | F | V | S |
| <i>P36544</i> | I  | A | Q | F | A  | S | T | M | I | I | V | G | L | S | V | V | T | V | I | V | L | Q | Y | H |   |

# ACHA7 TM4

## TM4

|               | IC |   | h |   | EC |   |   |   |   |   |   |   |   |   |   |   |   |   |   |   |   |   |   |   |
|---------------|----|---|---|---|----|---|---|---|---|---|---|---|---|---|---|---|---|---|---|---|---|---|---|---|
| <i>P23979</i> | V  | L | D | R | L  | L | F | R | I | Y | L | L | A | V | L | A | S | I | T | L | V | T | L |   |
| <i>P28476</i> | A  | I | D | K | Y  | S | R | L | I | F | P | A | S | Y | I | F | F | N | L | I | Y | W | S | V |
| <i>P24046</i> | A  | I | D | K | Y  | S | R | I | I | F | P | A | A | Y | I | L | F | N | L | I | Y | W | S | I |
| <i>P26714</i> | T  | I | D | K | Y  | A | R | L | M | F | P | L | L | F | I | I | F | N | T | S | Y | W | S | V |
| <i>P19019</i> | A  | I | D | R | W  | S | R | M | V | F | P | F | T | S | L | F | N | L | I | Y | W | L | Y |   |
| <i>P24045</i> | T  | I | D | K | W  | S | R | I | I | F | P | I | T | F | G | F | F | N | L | V | Y | W | L | Y |
| <i>P08220</i> | S  | I | D | K | W  | S | R | M | F | F | P | I | T | F | S | L | F | N | V | Y | W | L | Y |   |
| <i>P25123</i> | D  | I | D | K | Y  | S | R | I | V | F | P | V | C | F | V | C | F | N | L | M | Y | W | I | I |
| <i>P22933</i> | T  | I | D | I | Y  | A | R | A | V | F | P | A | A | F | A | A | V | N | I | I | Y | W | A | A |
| <i>L8IEJ2</i> | K  | I | D | K | I  | S | R | I | G | F | P | M | A | F | L | I | F | N | M | F | Y | W | I | I |
| <i>P36544</i> | V  | D | R | L | C  | L | M | A | F | S | V | T | I | I | C | T | I | G | I | L | M | S |   |   |

# Aquaporin TM1

TM1

|               | IC                        |   | h            |          | EC       |        |
|---------------|---------------------------|---|--------------|----------|----------|--------|
| <i>P29972</i> | KLFWRAVVAEFLA             | T | TLFVFISIGS   | S        | ALGFK    |        |
| <i>P0AER0</i> | STLKGQCIAEFLG             | T | GLLIFFGVGCVA | A        | ALK      |        |
| <i>Q6J8I9</i> | ASFWRAIFAEFFA             | T | LFYVFFGLGAS  | L        | RWA      |        |
| <i>Q9C4Z5</i> | VSLTKRCIAEFIG             | T | FLVFFGAGSA   | A        | VTL      |        |
| <i>P60844</i> | --MFRKLAECFG              | T | FWLVFGGCGS   | A        | VLAA     |        |
| <i>Q8WPZ6</i> | KSYVREFIGEF               | L | GTFLVLMFLG   | E        | GATANFH  |        |
| <i>Q41372</i> | WSFWRAAIAEFIA             | T | LLFLYITVATV  | I        | GHS      |        |
| <i>P55064</i> | VAFLKAVFAEFLA             | T | LIFVFFGLGS   | A        | LKWP     |        |
| <i>P55087</i> | QAFWKAVTAEFLA             | M | LIFVLLSLG    | S        | TINWG    |        |
| <i>Q8UJW4</i> | --MGRKLLAEFF              | G | TFWLVFGGCG   | S        | AVFAA    |        |
| <i>O28846</i> | MTLAKRFTA                 | E | VVGTFLVFFG   | P        | GAAVITL  |        |
| <i>F2QVG4</i> | RNHFIAMSGE                | F | VGTFLVSAF    | V        | IAQIAN   |        |
| <i>P41181</i> | IAFSRVFAEFLA              | T | LLFVFFGLG    | S        | ALNWP    |        |
| <i>Q41951</i> | LASLRAYLAEFIS             | T | LLFVFAGVGS   | A        | IAYA     |        |
| <i>P23645</i> | LEFWSIISECLA              | S | FMYVFIVCG    | A        | AAAGVG   |        |
| <i>P23900</i> | NTYLKEFLAE                | F | MGTMMVMIIF   | G        | SAVVCQVN |        |
| <i>P06624</i> | ASFWRAICAEFFA             | S | LFYVFFGLGAS  | L        | RWA      |        |
| <i>Q08451</i> | WSFYRAGIAEFMA             | T | FLYITILTVM   | G        | LK       |        |
| <i>P43286</i> | WSFYRAVIAEFVA             | T | LLFLYITVLT   | V        | IGYK     |        |
| <i>P25818</i> | PDALKAALAEFIS             | T | LIFVVAGSG    | S        | GMAFN    |        |
| <i>P26587</i> | PD <del>S</del> IRATLAEFL | S | T            | TFVFVFAE | G        | SILSLD |
| <i>P08995</i> | VPFLQKLVAEAV              | G | TYFLIFAGCAS  | L        | VVNE     |        |
| <i>O24389</i> | VGSLKAYLAEFIA             | T | LLFVFAGVGS   | A        | IAYN     |        |

# Aquaporin TM2

TM2

|        | EC |   | h |   | IC |   |   |   |   |   |   |   |   |   |   |   |   |   |   |   |   |   |   |   |
|--------|----|---|---|---|----|---|---|---|---|---|---|---|---|---|---|---|---|---|---|---|---|---|---|---|
| P29972 | D  | N | V | K | V  | S | L | A | F | G | L | S | I | A | T | L | A | Q | S | V | G | H | I | S |
| P0AER0 | G  | Q | W | E | I  | S | V | I | W | G | L | G | V | A | M | A | I | Y | L | T | A | G | V | S |
| Q6J8I9 | H  | V | L | Q | V  | A | L | A | F | G | L | A | L | A | T | L | V | Q | A | V | G | H | I | S |
| Q9C4Z5 | D  | W | V | A | I  | G | L | A | F | G | F | A | I | A | A | S | I | Y | A | L | G | N | I | S |
| P60844 | G  | F | A | G | V  | A | L | A | F | G | L | T | V | L | T | M | A | F | A | V | G | H | I | S |
| Q8WPZ6 | D  | W | Y | K | L  | C | L | G | W | G | L | A | V | F | F | G | I | L | V | S | A | K | L | S |
| Q41372 | G  | L | L | G | I  | A | W | A | F | G | G | M | I | F | V | L | V | Y | C | T | A | G | I | S |
| P55064 | T  | I | L | Q | I  | A | L | A | F | G | L | A | I | G | T | L | A | Q | A | L | G | P | V | S |
| P55087 | D  | M | V | L | I  | S | L | C | F | G | L | S | I | A | T | M | V | Q | C | F | G | H | I | S |
| Q8UJW4 | G  | F | T | G | V  | A | L | A | F | G | L | T | V | L | T | M | A | Y | A | V | G | G | I | S |
| O28846 | D  | W | F | A | I  | G | M | A | F | A | L | A | I | A | A | V | I | Y | S | L | G | R | I | S |
| F2QVG4 | Q  | L | I | M | I  | S | F | G | F | G | F | G | V | M | V | G | V | F | I | T | Y | R | V | S |
| P41181 | S  | V | L | Q | I  | A | M | A | F | G | L | G | I | G | T | L | V | Q | A | L | G | H | I | S |
| Q41951 | G  | L | V | A | I  | A | V | C | H | G | F | A | L | F | V | A | V | A | I | G | A | N | I | S |
| P23645 | V  | L | L | A | T  | A | L | A | S | G | L | A | M | A | T | L | T | Q | C | F | L | H | I | S |
| P23900 | T  | F | D | D | V  | A | L | G | W | A | A | A | V | M | G | Y | F | C | A | G | G | S | A |   |
| P06624 | H  | V | L | Q | V  | A | L | A | F | G | L | A | L | A | T | L | V | Q | A | V | G | H | I | S |
| Q08451 | G  | I | Q | G | V  | A | W | A | F | G | G | M | I | F | A | L | V | Y | C | T | A | G | I | S |
| P43286 | G  | I | L | G | I  | A | W | A | F | G | G | M | I | F | I | L | V | Y | C | T | A | G | I | S |
| P25818 | G  | L | V | A | A  | V | A | H | A | F | G | L | F | V | A | V | S | V | G | A | N | I | S |   |
| P26587 | G  | L | I | L | V  | A | L | A | H | A | F | A | A | V | S | A | A | I | N | V | S |   |   |   |
| P08995 | T  | F | P | G | I  | A | I | V | W | G | L | V | L | T | V | L | V | Y | T | V | G | H | I | S |
| O24389 | G  | L | V | A | I  | A | V | A | H | A | F | L | F | V | G | V | S | M | A | A | N | I | S |   |

# Aquaporin TM2B

TM2B

IC

|               |              |
|---------------|--------------|
| <i>P29972</i> | PAVTLG LLLSC |
| <i>P0AER0</i> | PAVTIALWLFA  |
| <i>Q6J8I9</i> | PAVTF AFLVGS |
| <i>Q9C4Z5</i> | PAVTIGLWSVK  |
| <i>P60844</i> | PAVTIGLWAGG  |
| <i>Q8WPZ6</i> | LAVSIGLSSIN  |
| <i>Q41372</i> | PAVTFGLFLAR  |
| <i>P55064</i> | PAITLALLVGN  |
| <i>P55087</i> | PAVTVAMVCTR  |
| <i>Q8UJW4</i> | PAVSVGLTVAG  |
| <i>O28846</i> | PAVTIALWSIG  |
| <i>F2QVG4</i> | PAVTLALVLAR  |
| <i>P41181</i> | PAVTVACLVGC  |
| <i>Q41951</i> | PAVTFGLAVGG  |
| <i>P23645</i> | PAVTLALCVVR  |
| <i>P23900</i> | PSITLANLVYR  |
| <i>P06624</i> | PAVTF AFLVGS |
| <i>Q08451</i> | PAVTFGLFLAR  |
| <i>P43286</i> | PAVTFGLFLAR  |
| <i>P25818</i> | PAVTFGAFVGG  |
| <i>P26587</i> | PAVTFGALVGG  |
| <i>P08995</i> | PAVTIAFASTR  |
| <i>O24389</i> | PAVTLGLAVGG  |

# Aquaporin TM3

TM3

|        | IC |   | h |   | EC |   |   |   |   |   |   |   |   |   |   |   |   |   |   |   |   |   |   |   |   |
|--------|----|---|---|---|----|---|---|---|---|---|---|---|---|---|---|---|---|---|---|---|---|---|---|---|---|
| P29972 | F  | R | A | L | M  | Y | I | I | A | O | C | V | G | A | I | V | A | T | A | I | L | S | G | I | T |
| P0AER0 | R  | K | V | I | P  | F | I | V | S | O | V | A | G | A | F | C | A | A | L | V | Y | G | L | Y |   |
| Q6J8I9 | L  | R | A | I | C  | Y | V | V | A | Q | L | L | G | A | V | A | G | A | A | V | L | Y | S | V | T |
| Q9C4Z5 | R  | E | V | V | P  | Y | I | I | A | Q | L | L | G | A | A | F | G | S | F | I | F | L | Q | C | A |
| P60844 | K  | E | V | V | G  | Y | V | I | A | Q | V | V | G | G | I | V | A | A | A | L | L | Y | L | I | A |
| Q8WPZ6 | K  | K | I | P | V  | Y | F | F | A | Q | L | L | G | A | F | V | G | T | S | T | V | Y | G | L | Y |
| Q41372 | L  | R | A | L | V  | M | I | A | Q | C | L | G | A | I | C | G | V | G | L | V | K | A | F | M |   |
| P55064 | L  | R | A | F | F  | Y | V | A | A | Q | L | V | G | A | I | A | G | A | G | I | L | Y | G | V | A |
| P55087 | A  | K | S | V | F  | Y | I | A | A | Q | C | L | G | A | I | I | G | A | G | I | L | Y | L | V | T |
| Q8UJW4 | S  | S | L | V | P  | Y | V | I | A | Q | V | A | G | A | I | V | A | A | A | A | L | Y | V | I | A |
| O28846 | R  | E | V | V | P  | Y | I | V | A | Q | F | I | G | A | A | L | G | S | L | L | F | L | A | C | V |
| F2QVG4 | P  | F | R | G | I  | L | M | A | F | T | Q | I | V | A | G | M | A | A | A | G | A | A | S | A | M |
| P41181 | L  | R | A | A | F  | Y | V | A | A | Q | L | L | G | A | V | A | G | A | A | L | L | H | E | I | T |
| Q41951 | I  | T | G | V | F  | Y | W | I | A | Q | L | L | G | S | T | A | A | C | F | L | L | K | Y | V | T |
| P23645 | I  | R | A | A | M  | Y | I | T | A | Q | C | G | G | G | I | A | G | A | A | L | L | Y | G | V | T |
| P23900 | K  | K | V | P | Y  | Y | F | A | G | Q | L | I | G | A | F | T | G | A | L | I | L | F | I | W | Y |
| P06624 | L  | R | A | I | C  | Y | M | V | A | Q | L | L | G | A | V | A | G | A | A | V | L | Y | S | V | T |
| Q08451 | T  | R | A | V | F  | Y | M | V | M | Q | C | L | G | A | I | C | G | A | G | V | V | K | G | F | M |
| P43286 | P  | R | A | L | L  | Y | I | I | A | Q | C | L | G | A | I | C | G | V | G | F | V | K | A | F | Q |
| P25818 | L  | R | G | I | L  | Y | W | I | A | Q | L | L | G | S | V | V | A | C | L | I | L | K | F | A | T |
| P26587 | I  | R | A | I | Y  | Y | W | I | A | Q | L | L | G | A | I | L | A | C | L | L | L | R | L | I | T |
| P08995 | I  | Q | V | P | A  | Y | V | V | A | Q | L | L | G | S | I | L | A | S | G | T | L | R | L | L | F |
| O24389 | L  | T | G | L | F  | Y | W | V | A | Q | L | L | G | S | T | V | A | C | L | L | L | K | Y | V | T |



# Aquaporin TM4

TM4

|               | EC |   | h |   | IC |   |   |   |   |   |   |   |   |   |   |   |   |   |   |   |   |   |   |
|---------------|----|---|---|---|----|---|---|---|---|---|---|---|---|---|---|---|---|---|---|---|---|---|---|
| <i>P29972</i> | S  | G | G | L | G  | I | E | I | I | G | T | L | Q | L | V | L | C | V | L | A | T |   |   |
| <i>P0AER0</i> | F  | V | A | F | A  | V | E | M | V | I | T | A | I | L | M | G | L | I | L | A | L | T |   |
| <i>Q6J8I9</i> | V  | G | A | T | I  | V | E | I | F | L | T | L | Q | F | V | L | C | I | F | A | T | Y |   |
| <i>Q9C4Z5</i> | Y  | W | A | M | L  | A | E | V | V | G | T | F | L | L | M | I | T | I | M | G | I | A |   |
| <i>P60844</i> | M  | L | S | A | L  | V | V | E | L | V | L | S | A | G | F | L | L | V | I | H | G | A |   |
| <i>Q8WPZ6</i> | L  | T | G | A | F  | F | N | E | L | I | L | T | G | I | L | L | L | V | I | L | V | V |   |
| <i>Q41372</i> | K  | G | T | A | L  | G | A | E | I | I | G | T | F | V | L | V | T | V | F | S | A | T |   |
| <i>P55064</i> | Q  | G | A | M | V  | V | E | L | I | L | T | F | Q | L | A | L | C | I | F | A | S | T |   |
| <i>P55087</i> | A  | G | H | G | L  | L | V | E | L | I | I | T | F | Q | L | V | F | T | I | F | A | S |   |
| <i>Q8UJW4</i> | L  | V | S | A | L  | L | I | E | I | I | L | T | A | F | F | L | I | V | I | L | G | S |   |
| <i>O28846</i> | Y  | G | A | I | L  | T | E | A | I | G | T | F | L | L | M | L | V | I | M | G | V | A |   |
| <i>F2QVG4</i> | R  | T | R | G | L  | F | L | E | A | F | G | T | A | I | L | C | L | T | V | L | M | L | A |
| <i>P41181</i> | A  | G | A | V | T  | V | E | L | F | L | T | L | Q | L | V | L | C | I | F | A | S | T |   |
| <i>Q41951</i> | S  | I | E | G | V  | M | E | I | I | I | T | F | A | L | V | T | V | Y | A | T | A |   |   |
| <i>P23645</i> | A  | W | E | R | F  | G | V | E | F | I | L | T | F | L | V | L | C | Y | F | V | S | T |   |
| <i>P23900</i> | S  | G | R | Q | F  | F | S | E | F | L | C | G | A | M | L | Q | A | G | T | F | A | L |   |
| <i>P06624</i> | V  | G | A | T | I  | V | E | I | F | L | T | L | Q | F | V | L | C | I | F | A | T | Y |   |
| <i>Q08451</i> | K  | G | D | G | L  | G | A | E | I | I | G | T | F | V | L | V | T | V | F | S | A | T |   |
| <i>P43286</i> | T  | G | T | G | L  | A | A | E | I | I | G | T | F | V | L | V | T | V | F | S | A | T |   |
| <i>P25818</i> | V  | L | N | A | F  | V | F | E | I | V | M | T | F | G | L | V | T | V | Y | A | T | A |   |
| <i>P26587</i> | A  | V | N | G | L  | V | L | E | I | I | L | T | F | G | L | V | V | Y | S | T | L |   |   |
| <i>P08995</i> | N  | L | A | F | V  | F | E | F | I | M | T | F | F | L | M | F | V | I | C | G | V | A |   |
| <i>O24389</i> | G  | A | E | G | V  | M | E | I | V | I | T | F | A | L | V | T | V | Y | A | T | A |   |   |

# Aquaporin TM5

TM5

|               | IC | h | EC |
|---------------|----|---|----|
| <i>P29972</i> | S  | A | L  |
| <i>P0AER0</i> | L  | A | P  |
| <i>Q6J8I9</i> | S  | V | L  |
| <i>Q9C4Z5</i> | F  | A | G  |
| <i>P60844</i> | F  | A | P  |
| <i>Q8WPZ6</i> | K  | L | S  |
| <i>Q41372</i> | L  | A | P  |
| <i>P55064</i> | S  | P | A  |
| <i>P55087</i> | S  | I | A  |
| <i>Q8UJW4</i> | F  | A | P  |
| <i>O28846</i> | F  | A | G  |
| <i>F2QVG4</i> | F  | A | P  |
| <i>P41181</i> | T  | P | A  |
| <i>Q41951</i> | I  | A | P  |
| <i>P23645</i> | N  | S | A  |
| <i>P23900</i> | V  | F | P  |
| <i>P06624</i> | S  | V | L  |
| <i>Q08451</i> | L  | A | P  |
| <i>P43286</i> | L  | A | P  |
| <i>P25818</i> | I  | A | P  |
| <i>P26587</i> | I  | A | P  |
| <i>P08995</i> | F  | A | G  |
| <i>O24389</i> | I  | A | P  |

# Aquaporin TM5B

TM5B

EC

|               |               |
|---------------|---------------|
| <i>P29972</i> | PARSFGSAVITH  |
| <i>P0AER0</i> | PARDFGPKVFAW  |
| <i>Q6J8I9</i> | PARSFAPAILTR  |
| <i>Q9C4Z5</i> | PARTFGPYLNDM  |
| <i>P60844</i> | PARSTAVAI FQG |
| <i>Q8WPZ6</i> | PSRDLGSRFLSL  |
| <i>Q41372</i> | PARSFGAAVIFN  |
| <i>P55064</i> | PARSFGPAVVMN  |
| <i>P55087</i> | PARSFGPAVIMG  |
| <i>Q8UJW4</i> | PARSTGQALFVG  |
| <i>O28846</i> | PARTFGPYLGDS  |
| <i>F2QVG4</i> | PARSFGPAVAAR  |
| <i>P41181</i> | PARSLAPAVVTG  |
| <i>Q41951</i> | PARSFGPAVAAG  |
| <i>P23645</i> | PARSLGPSFVLN  |
| <i>P23900</i> | LARDLGPRRLALY |
| <i>P06624</i> | PARSFAPAILTR  |
| <i>Q08451</i> | PARSLGAAIIYN  |
| <i>P43286</i> | PARSFGAAVIYN  |
| <i>P25818</i> | PAVAFGPAVVSW  |
| <i>P26587</i> | PARAFGPALVGW  |
| <i>P08995</i> | PARSLGPAFVHG  |
| <i>O24389</i> | PARSFGPAVVAG  |

# Aquaporin TM6

TM6

|               | EC | h | IC |
|---------------|----|---|----|
| <i>P29972</i> | N  | H | W  |
| <i>P0AER0</i> | Y  | F | L  |
| <i>Q6J8I9</i> | N  | H | W  |
| <i>Q9C4Z5</i> | Y  | P | I  |
| <i>P60844</i> | Q  | L | W  |
| <i>Q8WPZ6</i> | Y  | F | W  |
| <i>Q41372</i> | D  | Q | W  |
| <i>P55064</i> | A  | H | W  |
| <i>P55087</i> | N  | H | W  |
| <i>Q8UJW4</i> | Q  | L | W  |
| <i>O28846</i> | Y  | F | P  |
| <i>F2QVG4</i> | H  | W | I  |
| <i>P41181</i> | D  | H | W  |
| <i>Q41951</i> | G  | H | W  |
| <i>P23645</i> | S  | H | W  |
| <i>P23900</i> | F  | F | W  |
| <i>P06624</i> | N  | H | W  |
| <i>Q08451</i> | D  | H | W  |
| <i>P43286</i> | D  | H | W  |
| <i>P25818</i> | N  | H | W  |
| <i>P26587</i> | D  | H | W  |
| <i>P08995</i> | G  | I | W  |
| <i>O24389</i> | Q  | N | W  |



# Foca TM2

TM2

|                   | EC |   |   | h |   | IC |   |   |   |   |   |   |   |   |   |   |   |   |   |   |
|-------------------|----|---|---|---|---|----|---|---|---|---|---|---|---|---|---|---|---|---|---|---|
| <i>E8XEH9</i>     | V  | R | P | L | V | M  | G | A | T | F | G | I | A | L | T | L | V | I | I | A |
| <i>Q186B7</i>     | M  | T | K | I | V | M  | G | L | S | F | A | I | A | L | S | L | V | I | M | T |
| <i>Q7CQU0</i>     | M  | A | K | L | I | G  | G | I | C | F | S | L | G | L | I | L | C | V | I | C |
| <i>Q9KRE7</i>     | V  | T | K | L | L | G  | G | L | A | F | S | L | G | L | I | L | V | V | I | T |
| <i>P0AC25</i>     | M  | A | K | L | V | G  | G | I | C | F | S | L | G | L | I | L | C | V | V | C |
| <i>P38750</i>     | I  | V | N | L | I | T  | G | V | N | F | A | M | G | L | F | Y | V | V | M | M |
| <i>Q8XCN1</i>     | G  | S | F | L | L | E  | N | L | G | Y | T | F | G | F | I | I | V | I | M | A |
| <i>A0A1Q4GXT8</i> | L  | I | N | L | M | G  | A | I | A | F | S | L | G | L | I | L | V | V | L | T |
| <i>Q8DPM4</i>     | S  | G | R | F | L | F  | P | F | V | F | A | W | G | L | A | Y | I | V | F | L |
| <i>Q8ZNA4</i>     | G  | G | F | L | L | E  | N | L | G | Y | T | F | G | F | I | I | V | I | M | A |
| <i>P37327</i>     | G  | S | F | L | L | E  | N | L | G | Y | T | F | G | F | I | I | V | I | M | A |
| <i>Q92E59</i>     | L  | G | K | I | T | Y  | A | F | M | F | S | W | S | L | V | M | I | I | Y | M |
| <i>W8U1Z5</i>     | I  | V | N | M | A | S  | A | I | T | F | S | F | A | L | V | L | I | L | F | T |

# Foca TM2B

TM2B

IC

|                   |               |
|-------------------|---------------|
| <i>E8XEH9</i>     | FTGHTMFLTLGVK |
| <i>Q186B7</i>     | FTGNMVMASAGML |
| <i>Q7CQU0</i>     | FTSTVLIVVAKAS |
| <i>Q9KRE7</i>     | FTSSVLILVAKAS |
| <i>P0AC25</i>     | FTSTVLIVVAKAS |
| <i>P38750</i>     | FNSNILFFSVGVL |
| <i>Q8XCNI</i>     | FTENTVTAVLPVM |
| <i>A0A1Q4GXT8</i> | LTSNFMVFTVGVY |
| <i>Q8DPM4</i>     | VTSNMMFLTAGSF |
| <i>Q8ZNA4</i>     | FTENTVTAVLPVM |
| <i>P37327</i>     | FTENTVTAVLPVM |
| <i>Q92E59</i>     | GTSNMMYMTIGVY |
| <i>W8U1Z5</i>     | LTSNFMVFTVGLY |





# Foca TM4

TM4

|                   | EC |   | h |   | IC |   |   |   |   |   |   |   |   |   |   |   |   |   |   |   |   |   |   |
|-------------------|----|---|---|---|----|---|---|---|---|---|---|---|---|---|---|---|---|---|---|---|---|---|---|
| <i>E8XEH9</i>     | A  | T | V | L | F  | F | K | G | A | L | C | N | W | L | V | C | L | A | I | W | M | A | I |
| <i>Q186B7</i>     | F  | T | A | L | F  | F | R | G | I | L | C | N | I | L | V | C | V | S | V | L | C | S | F |
| <i>Q7CQU0</i>     | F  | I | E | A | V  | C | L | G | I | L | A | N | L | M | V | C | L | A | V | W | M | S | Y |
| <i>Q9KRE7</i>     | F  | L | Q | A | F  | A | L | G | L | M | C | N | I | L | V | C | L | A | V | W | M | T | F |
| <i>P0AC25</i>     | F  | I | E | A | V  | C | L | G | I | L | A | N | L | M | V | C | L | A | V | W | M | S | Y |
| <i>P38750</i>     | F  | V | Q | T | F  | L | K | G | I | A | C | N | F | F | V | C | L | A | I | Y | L | Q | L |
| <i>Q8XCN1</i>     | P  | S | E | M | F  | A | N | A | I | I | S | G | W | L | I | A | T | M | V | W | M | F | P |
| <i>A0A1Q4GXT8</i> | W  | L | N | I | F  | T | K | G | I | F | C | N | F | F | I | N | I | G | I | F | I | S | M |
| <i>Q8DPM4</i>     | N  | E | L | V | L  | L | E | A | I | L | A | N | I | F | V | N | I | A | I | L | S | F | I |
| <i>Q8ZNA4</i>     | P  | T | E | M | F  | A | N | A | I | I | S | G | W | I | I | A | T | M | V | W | M | F | P |
| <i>P37327</i>     | P  | S | E | M | F  | A | N | A | I | I | S | G | W | L | I | A | T | M | V | W | M | F | P |
| <i>Q92E59</i>     | P  | L | Q | I | F  | V | E | G | I | F | A | N | I | V | V | N | T | A | V | L | C | T | L |
| <i>W8U1Z5</i>     | F  | V | S | I | L  | M | K | A | I | F | A | N | F | F | I | N | I | S | L | V | I | A | M |

# Foca TM5

TM5

|                   | IC |   | h |   | EC |   |   |   |   |   |   |   |   |   |   |   |
|-------------------|----|---|---|---|----|---|---|---|---|---|---|---|---|---|---|---|
| <i>E8XEH9</i>     | T  | A | K | F | L  | A | I | W | C | L | L | A | F | I | A | S |
| <i>Q186B7</i>     | T  | A | K | I | I  | M | I | F | L | C | L | F | A | F | I | S |
| <i>Q7CQU0</i>     | M  | D | K | A | F  | I | M | V | L | P | V | A | M | F | V | A |
| <i>Q9KRE7</i>     | T  | D | K | V | M  | V | L | I | L | P | V | A | M | F | V | S |
| <i>P0AC25</i>     | M  | D | K | A | F  | I | M | V | L | P | V | A | M | F | V | A |
| <i>P38750</i>     | H  | V | K | F | I  | L | M | S | F | P | I | I | D | F | I | G |
| <i>Q8XCN1</i>     | A  | A | K | I | V  | V | I | I | L | M | T | W | L | I | A | L |
| <i>A0A1Q4GXT8</i> | L  | T | K | A | F  | F | I | A | C | G | V | V | V | F | V | M |
| <i>Q8DPM4</i>     | G  | A | K | L | W  | L | V | L | S | A | I | Y | M | F | V | L |
| <i>Q8ZNA4</i>     | G  | A | K | I | V  | V | I | I | L | M | T | W | L | I | A | L |
| <i>P37327</i>     | A  | A | K | I | V  | V | I | I | L | M | T | W | L | I | A | L |
| <i>Q92E59</i>     | A  | G | K | V | I  | A | M | I | F | I | F | I | F | A | F | L |
| <i>W8U1Z5</i>     | L  | A | K | M | F  | V | M | M | F | G | V | T | I | F | A | M |

# Foca TM5B

|                   | TM5B           |
|-------------------|----------------|
|                   | EC             |
| <i>E8XEH9</i>     | VANMTLFALSWFGH |
| <i>Q186B7</i>     | VANMTIYSVSLFSP |
| <i>Q7CQU0</i>     | IANMFMPMGIVIR  |
| <i>Q9KRE7</i>     | IANMFQVPMAGIK  |
| <i>P0AC25</i>     | IANMFMPMGIVIR  |
| <i>P38750</i>     | VGDMSASFIAMLNG |
| <i>Q8XCN1</i>     | VVGSVEILYLVFNG |
| <i>A0A1Q4GXT8</i> | VFNAGLYAGMVFFN |
| <i>Q8DPM4</i>     | AANFASFIVKFSV  |
| <i>Q8ZNA4</i>     | VVGSVEILYLVFNG |
| <i>P37327</i>     | VVGSVEILYLVFNG |
| <i>Q92E59</i>     | IANFSSFLAFFAS  |
| <i>W8UIZ5</i>     | VVNSCLEMGGLIYO |



# GPCR TM1

TM1

|        | EC |   | h |   | IC |   |   |   |   |   |   |   |   |   |   |   |   |   |   |   |   |   |   |   |   |   |   |   |   |   |  |  |
|--------|----|---|---|---|----|---|---|---|---|---|---|---|---|---|---|---|---|---|---|---|---|---|---|---|---|---|---|---|---|---|--|--|
| 014842 | L  | P | P | Q | L  | S | F | G | L | V | A | A | F | A | L | G | F | P | L | N | V | L | A | I | R | G | A | T | A |   |  |  |
| 043613 | Q  | Y | E | W | V  | L | I | A | A | Y | V | A | V | F | V | V | A | L | V | G | N | T | L | V | C | L | A | V | R |   |  |  |
| P07550 | V  | W | V | G | M  | G | I | V | M | S | L | I | V | L | A | I | V | F | G | N | V | L | V | T | A | I | A | K |   |   |  |  |
| P08100 | W  | Q | F | S | M  | L | A | A | Y | M | F | L | L | I | V | L | G | F | P | I | N | F | L | T | L | Y | V | T | V | Q |  |  |
| P08172 | F  | E | V | F | I  | V | L | V | A | G | S | L | S | L | V | T | I | I | G | N | I | L | V | M | V | S | I | K | V |   |  |  |
| P08173 | V  | E | M | V | F  | I | A | T | V | T | G | S | L | S | L | V | T | V | V | G | N | I | L | V | M | L | S | I | K | V |  |  |
| P11229 | W  | Q | V | A | F  | I | G | I | T | T | G | L | L | S | L | A | T | V | T | G | N | L | L | V | L | I | S | F | K | V |  |  |
| P21453 | N  | S | I | K | L  | T | S | V | F | I | L | I | C | C | F | I | I | L | E | N | I | F | V | L | L | T | I | W | K |   |  |  |
| P21554 | S  | Q | L | A | I  | A | V | L | S | L | T | L | G | T | F | T | V | L | E | N | L | L | V | L | C | V | I | L | H |   |  |  |
| P24530 | T  | F | K | Y | I  | N | T | V | V | S | C | L | V | F | V | L | G | I | I | G | N | S | T | L | L | R | I | I | Y | K |  |  |
| P25024 | L  | N | K | Y | V  | V | I | A | Y | A | L | V | F | L | L | S | L | L | G | N | S | L | V | M | L | V | I | L | Y |   |  |  |
| P25116 | W  | L | T | L | F  | V | P | S | V | Y | T | G | V | F | V | S | L | P | L | N | I | M | A | I | V | V | F | I | L |   |  |  |
| P28222 | P  | W | K | V | L  | L | V | M | L | L | A | L | I | T | L | A | T | T | L | S | N | A | F | V | I | A | T | V | Y | R |  |  |
| P29274 | M  | G | S | S | V  | I | T | V | E | L | A | I | A | V | L | A | I | L | G | N | V | L | V | C | W | A | V | W | L |   |  |  |
| P30542 | A  | F | Q | A | A  | Y | I | G | I | E | V | L | I | A | L | V | S | V | P | G | N | V | L | V | I | W | A | V | K | V |  |  |
| P35367 | P  | Q | L | M | P  | L | V | W | L | S | T | I | C | L | V | T | V | G | L | N | L | L | V | L | Y | A | V | R | S |   |  |  |
| P35462 | R  | P | H | A | Y  | A | L | S | Y | C | A | L | I | L | A | I | V | F | G | N | L | V | C | M | A | V | L | K |   |   |  |  |
| P41143 | A  | L | A | I | A  | I | T | A | L | Y | S | A | V | C | A | V | G | L | L | G | N | V | L | V | M | F | G | I | V | R |  |  |
| P41145 | A  | I | P | V | I  | T | A | V | S | V | V | F | V | G | L | V | G | N | S | L | V | M | F | V | I | R |   |   |   |   |  |  |
| P41146 | G  | L | K | V | T  | I | V | G | L | Y | L | A | V | C | V | G | G | L | L | G | N | C | L | V | M | Y | V | I | R |   |  |  |
| P41597 | I  | G | A | Q | L  | L | P | P | L | Y | S | L | V | F | I | F | G | F | V | G | N | L | V | L | I | L | I | N |   |   |  |  |
| P47900 | F  | Q | F | Y | L  | P | A | V | I | L | V | F | I | I | G | F | L | G | N | S | V | A | I | W | M | F | V |   |   |   |  |  |
| P50052 | K  | H | L | D | A  | I | P | I | L | Y | I | I | F | V | I | G | F | L | V | N | I | V | V | T | L | F | C | C |   |   |  |  |
| P51681 | I  | A | A | R | L  | L | P | P | L | Y | S | L | V | F | I | F | G | F | V | G | N | L | V | I | L | I | L | I | N |   |  |  |
| P51686 | F  | A | S | H | F  | L | P | P | L | Y | W | L | V | F | I | V | G | A | L | G | N | S | L | V | I | L | V | Y | W |   |  |  |
| P55085 | L  | T | T | V | F  | L | P | I | V | T | I | V | F | V | G | L | P | S | N | G | M | A | L | W | V | F | L | F |   |   |  |  |
| P61073 | F  | N | K | I | F  | L | P | T | I | Y | S | I | I | F | L | T | G | I | V | G | N | L | V | I | L | V | M | G | Y |   |  |  |
| Q92633 | T  | V | S | K | L  | V | M | G | L | G | I | T | V | C | I | F | I | M | L | A | N | L | L | V | M | V | A | I | Y | V |  |  |
| Q9H244 | I  | T | Q | V | L  | F | P | L | L | Y | T | V | L | F | F | V | G | L | I | T | N | G | L | A | M | R | I | F | F | Q |  |  |
| P20789 | Y  | S | K | V | L  | V | A | I | Y | L | A | L | F | V | V | G | T | V | G | N | S | V | T | A | F | T | L | A | R |   |  |  |
| P34998 | V  | H | Y | H | V  | A | I | I | N | Y | L | G | H | C | I | S | L | V | A | L | L | V | A | F | V | L | F | L | R |   |  |  |
| P43220 | E  | Q | L | L | F  | L | Y | I | I | Y | T | V | G | Y | A | L | S | F | S | A | L | V | I | A | S | A | I | L | L | G |  |  |
| P47871 | K  | M | Y | S | S  | F | Q | V | M | Y | T | V | G | Y | S | L | S | L | G | A | L | L | L | A | I | L | G | G |   |   |  |  |
| P41594 | R  | W | G | D | P  | E | P | I | A | A | V | F | A | C | L | G | L | L | A | T | L | F | V | T | V | V | F | I | I |   |  |  |
| Q13255 | E  | W | S | N | I  | E | S | I | I | A | I | A | F | S | C | L | G | I | L | V | T | L | F | V | T | L | I | F | V | L |  |  |
| Q99835 | A  | E | H | O | D  | M | H | S | Y | I | A | A | F | G | A | V | T | G | L | C | T | L | F | T | L | A | T | F | V | A |  |  |

# GPCR TM2

TM2

|        | IC |   | h |   | EC |   |   |   |   |   |   |   |   |   |   |   |   |   |   |   |   |   |   |   |   |   |   |   |   |
|--------|----|---|---|---|----|---|---|---|---|---|---|---|---|---|---|---|---|---|---|---|---|---|---|---|---|---|---|---|---|
| 014842 | P  | S | L | W | A  | L | N | L | G | C | S | D | L | L | L | T | V | S | L | P | L | K | A | V | E | A | L | A |   |
| 043613 | V  | T | N | Y | F  | I | V | N | L | S | L | A | D | V | L | V | T | A | I | C | L | P | A | S | L | L | V | D | I |
| P07550 | V  | T | N | Y | F  | I | T | S | L | A | C | A | D | L | V | M | G | L | A | V | P | F | G | A | A | H | I | L |   |
| P08100 | P  | L | N | Y | I  | L | L | N | L | A | V | A | D | L | F | M | V | L | G | G | F | T | S | T | L | Y | T | S | L |
| P08172 | V  | N | N | Y | F  | L | F | S | L | A | C | A | D | L | I | I | G | V | F | S | M | N | L | Y | T | L | Y | T | V |
| P08173 | V  | N | N | Y | F  | L | F | S | L | A | C | A | D | L | I | I | G | A | F | S | M | N | L | Y | T | V | Y | I | I |
| P11229 | V  | N | N | Y | F  | L | L | S | L | A | C | A | D | L | I | I | G | T | F | S | M | N | L | Y | T | T | Y | L | L |
| P21453 | P  | M | Y | F | I  | G | N | L | A | L | S | D | L | L | A | G | V | A | T | A | N | L | L | L | S | G | A |   |   |
| P21554 | P  | S | Y | H | F  | I | G | S | L | A | V | A | D | L | L | G | S | V | I | F | W | S | F | I | D | F | H | V |   |
| P24530 | G  | P | N | I | L  | I | A | S | L | A | L | G | D | L | L | H | I | V | I | D | I | P | I | N | V | K | L | L |   |
| P25024 | V  | T | D | V | L  | L | N | L | A | L | A | D | L | L | F | A | L | T | L | P | I | W | A | A | S | K | V | N |   |
| P25116 | P  | A | V | V | M  | L | H | L | A | T | A | D | V | L | F | V | S | V | L | P | F | K | I | S | Y | F | S |   |   |
| P28222 | P  | A | N | Y | L  | I | A | S | L | A | V | T | D | L | L | V | S | I | L | V | M | P | I | S | T | M | Y | T | V |
| P29274 | V  | T | N | Y | F  | V | V | S | L | A | A | A | D | I | A | V | G | V | L | A | I | P | F | A | I | T | I | S | T |
| P30542 | A  | T | F | C | F  | I | V | S | L | A | V | A | D | V | A | V | G | A | L | V | I | P | L | A | I | L | I | N | I |
| P35367 | V  | G | N | L | Y  | I | V | S | L | S | V | A | D | L | I | V | G | A | V | M | P | M | N | I | L | Y | L | L |   |
| P35462 | T  | T | N | Y | L  | V | S | L | A | V | A | D | L | L | V | A | T | L | V | M | P | W | V | Y | L | E | V |   |   |
| P41143 | A  | T | N | I | Y  | I | F | N | L | A | L | A | D | A | L | A | T | S | T | L | P | F | Q | S | A | K | Y | L | M |
| P41145 | A  | T | N | I | Y  | I | F | N | L | A | L | A | D | A | L | V | T | T | M | P | F | Q | S | T | V | Y | L | M |   |
| P41146 | A  | T | N | I | Y  | I | F | N | L | A | L | A | D | T | L | V | L | L | T | L | P | F | Q | G | T | D | I | L | L |
| P41597 | L  | T | D | I | Y  | L | L | N | L | A | I | S | D | L | L | F | L | I | T | L | P | L | W | A | H | S | A | A | N |
| P47900 | G  | I | S | V | M  | F | N | L | A | L | A | D | F | L | Y | V | L | T | L | P | A | L | I | F | Y | F | N |   |   |
| P50052 | V  | S | S | I | Y  | I | F | N | L | A | V | A | D | L | L | L | L | A | T | L | P | L | W | A | T | Y | S | Y |   |
| P51681 | M  | T | D | I | Y  | L | L | N | L | A | I | S | D | L | F | F | L | L | T | V | P | F | W | A | H | Y | A | A | A |
| P51686 | M  | T | D | M | F  | L | L | N | L | A | I | A | D | L | L | F | L | V | T | L | P | F | W | A | I | A | A | A | D |
| P55085 | P  | A | V | I | Y  | M | A | N | L | A | L | A | D | L | L | S | V | I | W | F | P | L | K | I | A | Y | H | I | H |
| P61073 | M  | T | D | K | Y  | R | L | H | L | S | V | A | D | L | L | F | V | I | T | L | P | F | W | A | V | D | A | V | A |
| Q92633 | P  | I | Y | L | M  | A | N | L | A | A | A | D | F | F | A | G | L | A | Y | F | Y | L | M | F | N | T | G | P |   |
| Q9H244 | N  | F | I | F | L  | K | N | T | V | I | S | D | L | L | M | I | L | T | F | P | F | K | I | L | S | D | A | K |   |
| P20789 | T  | V | H | Y | H  | L | G | S | L | A | L | S | D | L | L | I | L | L | L | A | M | P | V | E | L | Y | N | F | I |
| P34998 | L  | R | N | I | H  | W | N | L | I | S | A | F | I | L | R | N | A | T | W | F | V | Q | L | T | M | S | P |   |   |
| P43220 | T  | R | N | Y | I  | H | L | N | L | F | A | S | F | I | L | R | A | L | S | V | F | I | K | D | A | A | L | K | W |
| P47871 | T  | R | N | A | I  | H | A | N | L | F | A | S | F | V | L | K | A | S | S | V | L | V | I | D | G | L | L | R | T |
| P41594 | S  | S | R | E | L  | C | Y | I | I | L | A | G | I | C | L | G | Y | L | C | T | F | C | L | I | A | K | P | K | - |
| Q13255 | S  | S | R | E | L  | C | Y | I | I | L | A | G | I | F | L | G | Y | V | C | P | F | T | L | I | A | K | P | T | - |
| Q99835 | Y  | P | A | V | I  | L | F | Y | M | N | A | C | F | F | V | G | S | I | G | W | L | A | O | F | M | D | G | A | R |

# GPCR TM3

TM3

|        | EC | h | IC |
|--------|----|---|----|
| 014842 | A  | S | L  |
| 043613 | H  | A | L  |
| P07550 | N  | F | W  |
| P08100 | P  | T | G  |
| P08172 | P  | V | V  |
| P08173 | A  | V | V  |
| P11229 | T  | L | A  |
| P21453 | P  | A | Q  |
| P21554 | R  | N | V  |
| P24530 | A  | E | M  |
| P25024 | T  | F | L  |
| P25116 | S  | E | L  |
| P28222 | Q  | V | V  |
| P29274 | C  | H | G  |
| P30542 | F  | H | T  |
| P35367 | R  | P | L  |
| P35462 | R  | I | C  |
| P41143 | E  | L | L  |
| P41145 | D  | V | L  |
| P41146 | N  | A | L  |
| P41597 | N  | A | M  |
| P47900 | D  | A | M  |
| P50052 | P  | V | M  |
| P51681 | N  | T | M  |
| P51686 | T  | F | M  |
| P55085 | E  | A | L  |
| P61073 | N  | F | L  |
| Q92633 | V  | S | T  |
| Q9H244 | T  | F | V  |
| P20789 | D  | A | G  |
| P34998 | V  | G | W  |
| P43220 | S  | L | S  |
| P47871 | V  | A | G  |
| P41594 | Q  | I | Y  |
| Q13255 | T  | T | S  |
| Q99835 | T  | L | S  |

# GPCR TM4

TM4

|        | IC |   | h |   | EC |   |   |   |   |   |   |   |   |   |   |   |   |   |   |   |   |   |   |   |   |
|--------|----|---|---|---|----|---|---|---|---|---|---|---|---|---|---|---|---|---|---|---|---|---|---|---|---|
| 014842 | P  | C | Y | S | W  | G | V | C | A | I | W | A | L | V | L | C | H | L | G | L | V | F | G | L |   |
| 043613 | A  | R | R | A | R  | G | S | I | L | G | I | W | A | V | S | L | A | I | M | V | P | Q | A | A | V |
| P07550 | K  | N | K | A | R  | V | I | L | M | V | W | I | V | S | G | L | T | S | F | L | P | I | Q | M |   |
| P08100 | E  | N | H | A | I  | M | G | V | A | F | T | W | V | M | A | L | A | C | A | A | P | P | L | A | G |
| P08172 | T  | K | M | A | G  | M | M | I | A | A | A | W | V | L | S | F | I | L | W | A | P | A | I | L | F |
| P08173 | T  | K | M | A | G  | L | M | I | A | A | A | W | V | L | S | F | V | L | W | A | P | A | I | L | F |
| P11229 | P  | R | R | A | A  | L | M | I | G | L | A | W | L | V | S | F | V | L | W | A | P | A | I | L | F |
| P21453 | N  | F | R | L | F  | L | L | I | S | A | C | W | V | I | S | L | I | L | G | G | L | P | I | M | G |
| P21554 | R  | P | K | A | V  | V | A | F | C | L | M | W | T | I | A | I | V | I | A | V | L | P | L | L | G |
| P24530 | P  | K | W | T | A  | V | E | I | V | L | I | W | V | V | S | V | L | A | V | P | E | A | I | G |   |
| P25024 | R  | H | L | V | K  | F | V | C | L | G | C | W | G | L | S | M | N | L | S | L | P | F | F | L | F |
| P25116 | L  | G | R | A | S  | F | T | C | L | A | I | W | A | L | A | I | A | G | V | V | P | L | L | L | K |
| P28222 | P  | K | R | A | A  | V | M | I | A | L | V | W | V | F | S | I | S | I | S | L | P | P | F | F | W |
| P29274 | G  | T | R | A | K  | G | I | I | A | I | C | W | V | L | S | F | A | I | G | L | T | P | M | L | G |
| P30542 | P  | R | R | A | A  | V | A | I | A | G | C | W | I | L | S | F | V | V | G | L | T | P | M | F | G |
| P35367 | K  | T | R | A | S  | A | T | I | L | G | A | W | F | L | S | F | L | W | V | I | P | I | L | G | W |
| P35462 | C  | R | R | V | A  | L | M | I | T | A | V | W | V | L | A | F | A | V | S | C | P | L | L | F | G |
| P41143 | P  | A | K | A | K  | L | I | N | I | C | I | W | V | L | A | S | G | V | G | V | P | I | M | V | M |
| P41145 | P  | L | K | A | K  | I | I | N | I | C | I | W | L | L | S | S | V | G | I | S | A | I | V | L |   |
| P41146 | S  | S | K | A | Q  | A | V | N | V | A | I | W | A | L | A | S | V | V | G | V | P | V | A | I | M |
| P41597 | V  | T | F | G | W  | T | S | V | I | T | W | L | V | A | V | F | A | S | V | P | G | I | I | F |   |
| P47900 | K  | K | N | A | I  | C | I | S | V | L | V | W | L | I | W | V | A | I | S | P | I | L | F | Y |   |
| P50052 | P  | W | Q | A | S  | I | V | P | L | V | W | C | M | A | C | L | S | L | P | T | F | Y | F |   |   |
| P51681 | V  | T | F | G | W  | T | S | V | I | T | W | V | A | V | F | A | S | L | P | G | I | I | F |   |   |
| P51686 | L  | L | Y | S | K  | M | V | C | F | T | I | W | V | L | A | A | A | L | C | I | P | E | I | L | Y |
| P55085 | A  | N | I | A | I  | G | I | S | L | A | I | W | L | L | I | L | L | V | T | I | P | L | V | V |   |
| P61073 | L  | L | A | E | K  | V | W | Y | V | G | V | W | I | P | A | L | L | L | T | I | P | D | F | I | F |
| Q92633 | N  | R | R | V | V  | V | I | V | I | W | T | M | A | I | V | M | G | A | I | P | S | V | G |   |   |
| Q9H244 | L  | L | G | A | K  | I | L | S | V | V | I | W | A | F | M | F | L | L | S | L | P | N | M | I | L |
| P20789 | R  | S | R | T | K  | K | F | I | S | A | I | W | L | A | S | A | L | L | A | I | P | M | L | F | T |
| P34998 | R  | L | R | K | W  | M | F | I | C | I | G | W | G | V | P | F | P | I | I | V | A | W | A | I | G |
| P43220 | Q  | W | I | F | R  | L | Y | V | S | I | G | W | G | V | P | L | L | F | V | V | P | W | G | I | V |
| P47871 | R  | S | F | F | S  | L | Y | L | G | I | G | W | G | A | P | M | L | F | V | V | P | W | A | V | V |
| P41594 | A  | C | A | Q | L  | V | I | A | F | I | L | I | C | I | Q | L | G | I | I | V | A | L | F | I | M |
| Q13255 | A  | W | A | Q | V  | I | A | S | I | L | I | S | V | Q | L | T | L | W | T | L | I | I | M |   |   |
| Q99835 | S  | G | K | T | S  | Y | F | H | L | L | T | W | S | L | P | F | V | L | T | V | A | I | L | A | V |



# GPCR TM5

TM5

|        | EC         | h                | IC                 |                 |                |          |         |            |         |
|--------|------------|------------------|--------------------|-----------------|----------------|----------|---------|------------|---------|
| 014842 | SAGPARFSL  | LLLLFFLPLAITAF   | CLRALAR            |                 |                |          |         |            |         |
| 043613 | YPKIYHSCFF | IIVTYLAPLGLMAMAY | FQIFRKLWG          |                 |                |          |         |            |         |
| P07550 | TNQAYAIAS  | SIVSFYVPLVIMVFW  | SRVFQEAQR          |                 |                |          |         |            |         |
| P08100 | NNE        | SFVIYMFVHF       | TIPMIIFFCYQLVFTVKE |                 |                |          |         |            |         |
| P08172 | SNAAVT     | FGTAIAAFYLPVIIM  | TVLYWHISRASKS      |                 |                |          |         |            |         |
| P08173 | SNPAVT     | FGTAIAAFYLPVIM   | TVLYIHISLASRS      |                 |                |          |         |            |         |
| P11229 | SQPIIT     | FGTAMAAFYLPVIM   | CTLYWRIYRETE       |                 |                |          |         |            |         |
| P21453 | LYHKHYIL   | CTTVFTLLLL       | SIVILYCRIYSLVRT    |                 |                |          |         |            |         |
| P21554 | HIDET      | LYMFWIGVTSVLL    | LFIYAYMYILWKAHS    |                 |                |          |         |            |         |
| P24530 | YKTAKD     | WWLFSFYFCLPLAIT  | AFFYTLMTCEMLR      |                 |                |          |         |            |         |
| P25024 | WRMVLRI    | LPHTFGFIVPLFV    | MLFCYGFILRRLF      |                 |                |          |         |            |         |
| P25116 | YYAYYF     | SAFSAVFFFVPLII   | STVCYVSIIRCLSS     |                 |                |          |         |            |         |
| P28222 | DHILYTV    | STVGAFYFPTLL     | LIALYGRIVYEARS     |                 |                |          |         |            |         |
| P29274 | PMNYMV     | YFNFFACVLVPL     | LLMLGVYLRIFLAARR   |                 |                |          |         |            |         |
| P30542 | SMEYMV     | YFNFFVWVLP       | PLLLMVLIIYLEVYLIRK |                 |                |          |         |            |         |
| P35367 | DVTWFK     | VMTAIIINFYLP     | TLLMLWFYAKIYKAVRQ  |                 |                |          |         |            |         |
| P35462 | SNPDF      | VIYSVVSFYLP      | FGVTVLVYARIYVVLKQ  |                 |                |          |         |            |         |
| P41143 | WDTVT      | KICVFLFAFV       | PIIITVCYGLMLLR     | LRS             |                |          |         |            |         |
| P41145 | WDLFM      | KICVFI           | FAFVIVLIIIV        | CVTLMILRLKS     |                |          |         |            |         |
| P41146 | WGPV       | FAICIFLFSF       | IVPVLVIVS          | CYSLMIRRLRG     |                |          |         |            |         |
| P41597 | WNNF       | HIMRNILGLV       | LPLIMVICYS         | SGILKTLR        |                |          |         |            |         |
| P47900 | SYFI       | YSMCTVAM         | FCVPLVLIL          | GCYGLIVRALIY    |                |          |         |            |         |
| P50052 | WSAG       | IALMKNILGF       | IIPLI              | FIATCYFGIRKHLLK |                |          |         |            |         |
| P51681 | WKNF       | QTLKIVIL         | GLVLP              | LLVMVICYS       | SGILKTLR       |          |         |            |         |
| P51686 | LKSA       | VTLKVI           | LGFFLP             | FVVMACCYT       | IIIIHTLIQ      |          |         |            |         |
| P55085 | DMFN       | YFLSLAIG         | VF                 | LFPAL           | TASAYVLMIRMLRS |          |         |            |         |
| P61073 | WVVVF      | QFQHIM           | VG                 | LILPG           | IIVLSCYCIIS    | SKLSH    |         |            |         |
| Q92633 | LYSD       | SYLVF            | WAIFNL             | VTFV            | VMVLYAHIF      | GYVRQ    |         |            |         |
| Q9H244 | VWHEI      | VNYICQ           | VIFWIN             | FLIV            | IVCYTLIT       | KELYR    |         |            |         |
| P20789 | TVK        | VVIQVNT          | FMSFL              | PMLV            | SILNT          | VIANKLTV |         |            |         |
| P34998 | RPG        | VYTDYI           | YQGP               | MLVLL           | INFI           | FLNIVRI  | LMT     |            |         |
| P43220 | NSNM       | NYWLI            | IRLPI              | LFAIG           | VN             | LIFVR    | VICIVVS |            |         |
| P47871 | NDNM       | GF               | WILR               | FPV             | LAIL           | INFF     | IFVR    | IQLLVA     |         |
| P41594 | NTTN       | LG               | VVTP               | PLGY            | NGLL           | ILS      | CTFY    | AFKTRNVPA- |         |
| Q13255 | NTSN       | LG               | VVAP               | PLGY            | NGLL           | IMS      | CTYY    | AFKTRNVPA- |         |
| Q99835 | KNYR       | Y                | RAGF               | VLAP            | IGL            | VLI      | GGY     | FLIR       | GVMTLFS |

# GPCR TM6

TM6

|        | IC    | h                | EC               |
|--------|-------|------------------|------------------|
| 014842 | RRKLR | AAVWAGGALLT      | LLLCVGPYNASNVASF |
| 043613 | RARRK | TAKMLMVLLVFALCY  | LPISVLNVLKR      |
| P07550 | LKEHK | KALKTGII         | MGTFILCWL        |
| P08100 | KAEKE | VTRMVIIMVIAFLIC  | WVPYASVAFYIF     |
| P08172 | SREKK | VTRTILAILLAFIIT  | WAPYNMVLINTF     |
| P08173 | ARERK | VTRTIFAILLAFILT  | WTPYNMVLVNTF     |
| P11229 | VKEK  | KAARTLSAILLAFILT | WTPYNIMVLVSTF    |
| P21453 | EKSL  | ALLKTVIIVLSVFIAC | WAPLFI           |
| P21554 | RMDIR | LAKTLVLI         | LWVLIICWGPLLAIMV |
| P24530 | KQRRE | VAKTVFCLVLFALC   | WLPHL            |
| P25024 | GQK   | HRAVRVIFAVLIF    | LLCWL            |
| P25116 | SKKS  | RALFLSAAVFCIF    | IICFGPTN         |
| P28222 | ARERK | ATKTGII          | LGAFIVCWL        |
| P29274 | QKEV  | HAAKSLAIIVGLF    | FALCWL           |
| P30542 | GKEL  | KIAKSLALILF      | LFALSWL          |
| P35367 | NRERK | AAKQLGF          | IMAAFILCWIPY     |
| P35462 | LREK  | KATQMV           | IVLGA            |
| P41143 | RS    | LRRITRMV         | LVVVGAFVVC       |
| P41145 | RNL   | RRITRLV          | LVVAVFVVC        |
| P41146 | RNL   | RRITRLV          | LVVAVFVGC        |
| P41597 | KKR   | HRAVRVIF         | TIMIVYFL         |
| P47900 | PL    | RRKSIYLV         | IIVLTVFAVS       |
| P50052 | ITR   | DQVLKMAAAV       | VLAFLIICWL       |
| P51681 | KKR   | HRAVR            | LIFTIMIVYFL      |
| P51686 | SSK   | HKALKV           | ITVLT            |
| P55085 | KKR   | KRAIKL           | IVTLAMYLIC       |
| P61073 | HQK   | RKALKT           | IVILIAFFAC       |
| Q92633 | DT    | MMSLLKT          | VWIVLGA          |
| Q9H244 | V     | PRKKNV           | KVFIIIAVFF       |
| P20789 | Q     | ALRHG            | VLVLR            |
| P34998 | I     | QYR              | KAVKATLV         |
| P43220 | D     | I                | KRLAKSTLT        |
| P47871 | D     | YKFR             | LAKSTLT          |
| P41594 | --    | NF               | NEAKYIAFT        |
| Q13255 | --    | NF               | NEAKYIAFT        |
| Q99835 | S     | KIN              | ETMLRLGIF        |

# GPCR TM7

TM7

|        | EC  |     |     | h   |   |   |   | IC |   |   |   |   |   |   |   |   |   |   |   |   |   |   |   |   |   |   |   |
|--------|-----|-----|-----|-----|---|---|---|----|---|---|---|---|---|---|---|---|---|---|---|---|---|---|---|---|---|---|---|
| 014842 | L   | G   | G   | S   | W | R | K | L  | G | L | I | T | G | A | W | S | V | L | N | P | L | V | T | G | Y | L |   |
| 043613 | A   | V   | Y   | A   | C | F | T | F  | S | H | W | L | V | A | N | S | A | A | N | P | I | I | N | F | L |   |   |
| P07550 | I   | R   | K   | E   | W | I | L | L  | N | W | I | G | Y | V | N | S | G | F | N | P | L | I | Y | C | R | S |   |
| P08100 | F   | G   | P   | I   | F | M | T | I  | P | A | F | F | A | K | S | A | A | I | N | P | V | I | Y | I | M | M |   |
| P08172 | I   | P   | N   | T   | V | W | T | I  | G | Y | W | L | C | Y | I | N | S | T | I | N | P | A | C | Y | A | L | C |
| P08173 | I   | P   | D   | T   | V | W | S | I  | G | Y | W | L | C | Y | V | N | S | T | I | N | P | A | C | Y | A | L | C |
| P11229 | V   | P   | E   | T   | L | W | E | L  | G | Y | W | L | C | Y | V | N | S | T | I | N | P | M | C | Y | A | L | C |
| P21453 | D   | I   | L   | F   | R | A | E | Y  | F | L | V | L | A | V | L | N | S | G | T | N | P | I | I | Y | T | L | T |
| P21554 | L   | I   | K   | T   | V | F | A | F  | C | S | M | L | C | L | L | N | S | T | V | N | P | I | I | Y | A | L | R |
| P24530 | F   | L   | L   | V   | L | D | Y | I  | G | I | N | M | A | S | L | N | S | C | I | N | P | I | A | L | Y | L | V |
| P25024 | N   | I   | G   | R   | A | L | D | A  | T | E | I | L | G | F | L | H | S | C | L | N | P | I | I | Y | A | F | I |
| P25116 | A   | A   | Y   | F   | A | L | L | C  | V | C | V | S | I | S | C | C | I | D | P | L | I | Y | Y | A |   |   |   |
| P28222 | F   | H   | L   | A   | I | F | D | F  | F | T | W | L | G | Y | L | N | S | L | I | N | P | I | I | Y | T | M | S |
| P29274 | A   | P   | L   | W   | L | M | Y | L  | A | I | V | L | S | H | T | N | S | V | V | N | P | F | I | Y | A | R |   |
| P30542 | K   | P   | S   | I   | L | T | Y | I  | A | I | F | L | T | H | G | N | S | A | M | N | P | I | V | Y | A | F | R |
| P35367 | C   | N   | E   | H   | L | M | F | T  | I | W | L | G | Y | I | N | S | T | L | N | P | L | I | Y | P | L | C |   |
| P35462 | V   | S   | P   | E   | L | Y | S | A  | T | T | W | L | G | Y | V | N | S | A | L | N | P | V | I | Y | T | T | F |
| P41143 | L   | V   | V   | A   | A | L | H | L  | C | I | A | L | G | Y | A | N | S | S | L | N | P | V | L | Y | A | F | L |
| P41145 | A   | A   | L   | S   | S | Y | F | C  | I | A | L | G | Y | T | N | S | S | L | N | P | I | L | Y | A | F | L |   |
| P41146 | T   | A   | V   | A   | I | L | R | F  | C | T | A | L | G | Y | V | N | S | C | L | N | P | I | L | Y | A | F | L |
| P41597 | Q   | L   | D   | Q   | A | T | Q | V  | T | E | T | L | G | M | T | H | C | C | I | N | P | I | I | Y | A | F | V |
| P47900 | R   | V   | Y   | A   | T | Y | Q | V  | T | R | G | L | A | S | L | N | S | C | V | D | P | I | L | Y | F | L | A |
| P50052 | V   | I   | D   | L   | A | L | P | F  | A | I | L | L | G | F | T | N | S | C | V | N | P | F | L | Y | C | F | V |
| P51681 | R   | L   | D   | Q   | A | M | Q | V  | T | E | T | L | G | M | T | H | C | C | I | N | P | I | I | Y | A | F | V |
| P51686 | N   | I   | D   | I   | C | F | Q | V  | T | Q | T | I | A | F | F | H | S | C | L | N | P | V | L | Y | V | F | V |
| P55085 | H   | V   | Y   | A   | L | I | V | A  | L | C | L | S | T | L | N | S | C | I | D | P | F | W | Y | F | V |   |   |
| P61073 | T   | V   | H   | K   | W | I | S | I  | T | E | A | L | A | F | F | H | C | C | L | N | P | I | L | Y | A | F | L |
| Q92633 | D   | V   | L   | A   | Y | E | K | F  | F | L | L | A | E | F | N | S | A | M | N | P | I | I | Y | S | Y | R |   |
| Q9H244 | T   | L   | F   | Y   | V | K | E | S  | T | L | W | L | T | S | L | N | A | C | L | D | P | F | I | Y | F | F | L |
| P20789 | F   | Y   | H   | Y   | F | M | L | T  | N | A | L | F | Y | V | S | S | A | I | N | P | I | L | Y | N | L | V |   |
| P34998 | S   | R   | V   | F   | I | Y | F | N  | S | F | L | E | S | F | Q | G | F | F | V | S | V | F | Y | C | F | L |   |
| P43220 | L   | R   | F   | I   | K | L | F | T  | E | L | S | F | T | S | F | Q | L | M | V | A | I | L | Y | C | F | V |   |
| P47871 | L   | R   | S   | A   | K | L | F | F  | D | L | F | L | S | S | F | Q | L | L | V | A | V | L | Y | C | F | L |   |
| P41594 | --- | --- | --- | --- | K | I | I | T  | M | C | F | S | V | S | L | S | A | T | V | A | L | G | C | M | F | V | P |
| Q13255 | --- | --- | --- | --- | K | I | I | T  | T | C | F | A | V | S | L | S | V | T | V | A | L | G | C | M | F | T | P |
| Q99835 | P   | S   | L   | L   | V | E | K | I  | N | L | F | A | M | F | G | T | G | I | A | M | S | T | W | W | T | K |   |

# MFS TM1

## TM1

|               | IC         |   | h |   | EC |   |   |   |   |   |   |   |   |   |   |   |   |   |   |   |   |   |   |   |   |   |   |   |   |   |   |   |   |   |   |   |   |
|---------------|------------|---|---|---|----|---|---|---|---|---|---|---|---|---|---|---|---|---|---|---|---|---|---|---|---|---|---|---|---|---|---|---|---|---|---|---|---|
| <i>P08194</i> | YRRLRWQ    | I | L | G | I  | F | G | I | F | F | G | Y | A | A | Y | L | V | R | K | N | F | A | L | A | M | P | Y | L | V | E | Q | G |   |   |   |   |   |
| <i>P02920</i> | MYYLKNTNF  | W | M | F | G  | L | F | F | F | F | F | F | I | M | G | A | Y | F | P | F | F | P | I | W | L | H | D | I |   |   |   |   |   |   |   |   |   |
| <i>P76350</i> | SLSRARRAAL | G | S | F | A  | G | A | V | D | W | Y | D | F | L | L | Y | G | I | T | A | A | L | V | F | N | R | E |   |   |   |   |   |   |   |   |   |   |
| <i>P0AEX3</i> | DTRRRIWAI  | V | G | A | S  | S | G | N | L | V | E | W | F | D | F | Y | V | S | F | C | S | L | Y | F | A | H | I | F |   |   |   |   |   |   |   |   |   |
| <i>Q5HRH0</i> | DGNNAKK    | T | V | I | A  | T | G | I | G | N | A | M | E | W | F | D | F | G | L | Y | S | L | A | V | I | S | K | N | F |   |   |   |   |   |   |   |   |
| <i>O51798</i> | GSPQQK     | K | T | F | W  | A | C | Y | S | G | W | A | L | D | S | F | D | M | Q | M | F | S | F | L | L | P | A | L | T | L | T | W |   |   |   |   |   |
| <i>P0C0L7</i> | DDGKLRKAI  | T | A | A | S  | L | G | N | A | M | E | W | F | D | F | G | V | Y | G | F | V | A | Y | A | L | G | K | V | F |   |   |   |   |   |   |   |   |
| <i>P37643</i> | PINSRNK    | V | L | V | A  | S | L | I | G | T | A | I | E | F | F | D | F | Y | I | Y | A | T | A | A | V | I | V | F | P | H | I |   |   |   |   |   |   |
| <i>P71369</i> | VNSY       | G | W | K | A  | L | I | G | S | A | V | G | Y | G | M | D | G | F | D | L | L | I | L | G | F | M | L | S | A | I | S | A | D | L |   |   |   |
| <i>P94131</i> | G          | S | H | T | W  | K | I | A | F | L | F | A | F | L | A | L | V | D | G | A | D | L | M | L | L | S | Y | S | L | N | S | I | K | A | E | F |   |
| <i>P11166</i> | V          | G | G | A | V  | L | G | S | L | Q | F | G | Y | N | T | G | V | I | N | A | P | Q | K | V | I | E | E | F | Y | N | Q | T | W | V | H | R | Y |
| <i>P0AGF4</i> | N          | S | S | Y | I  | F | S | I | T | L | V | A | T | L | G | G | L | L | F | G | Y | D | T | A | V | I | S | G | T | V | E | S | L | N | T | V | F |
| <i>P11551</i> | G          | O | S | R | S  | Y | I | P | F | A | L | L | C | S | L | F | L | W | A | V | A | N | N | L | N | D | I | L | L | P | O | F | O | O | A |   |   |





# MFS TM4

## TM4

|               | EC |   | h |   |   |   |   | IC |   |   |   |   |   |   |   |   |   |   |   |   |   |   |   |   |   |   |   |   |
|---------------|----|---|---|---|---|---|---|----|---|---|---|---|---|---|---|---|---|---|---|---|---|---|---|---|---|---|---|---|
| <i>P08194</i> | I  | A | V | M | F | V | L | L  | F | L | C | G | M | F | Q | G | M | G | W | P | P | C | G | R | T | M | V | H |
| <i>P02920</i> | L  | V | G | S | I | V | G | G  | I | Y | L | G | F | C | F | N | A | G | A | P | A | V | E | A | F | I | E | K |
| <i>P76350</i> | P  | I | L | L | V | T | L | R  | A | I | Q | G | F | A | V | G | G | E | W | G | G | A | L | L | S | V | E |   |
| <i>P0AEX3</i> | P  | A | L | L | L | A | R | L  | F | Q | G | L | S | V | G | G | E | Y | G | T | S | A | T | Y | M | S | E |   |
| <i>Q5HRH0</i> | P  | I | L | L | L | A | R | V  | L | Q | G | F | S | T | G | G | E | Y | A | G | A | M | V | Y | V | A | E |   |
| <i>O51798</i> | Y  | Q | L | L | I | A | R | T  | L | Q | G | L | G | F | G | G | E | W | A | V | G | A | L | M | A | E |   |   |
| <i>P0C0L7</i> | P  | I | L | L | I | C | K | M  | A | Q | G | F | S | V | G | G | E | Y | T | G | A | S | I | F | V | A | E |   |
| <i>P37643</i> | P  | L | L | A | L | A | R | F  | G | Q | G | L | G | L | G | G | E | W | G | G | A | L | L | A | T | E |   |   |
| <i>P71369</i> | Y  | W | D | L | L | I | Y | R  | T | I | A | G | I | G | L | G | G | E | F | G | I | G | M | A | L | A | E |   |
| <i>P94131</i> | F  | I | Q | F | G | V | L | R  | F | F | A | S | L | G | L | G | S | L | Y | I | A | C | N | T | L | M | A | E |
| <i>P11166</i> | F  | E | M | L | I | L | G | R  | F | I | I | G | V | Y | C | G | L | T | G | F | V | P | M | Y | V | G | E |   |
| <i>P0AGF4</i> | V  | P | E | F | V | I | Y | R  | I | I | G | G | I | G | V | G | L | A | S | M | L | S | P | M | Y | I | A | E |
| <i>P11551</i> | Y  | T | L | F | L | V | G | L  | F | I | A | A | G | L | G | C | L | E | T | A | A | N | P | F | V | T | V |   |





# MFS TM6

TM6

|               | EC |   | h |   | IC |   |   |   |   |   |   |   |   |   |   |   |   |   |   |   |   |   |   |   |
|---------------|----|---|---|---|----|---|---|---|---|---|---|---|---|---|---|---|---|---|---|---|---|---|---|---|
| <i>P08194</i> | H  | A | L | Y | M  | P | A | F | C | A | I | L | V | A | L | F | A | F | A | M | M | R | D |   |
| <i>P02920</i> | I  | N | N | F | V  | F | W | L | G | S | G | C | A | L | I | L | A | V | L | L | F | F | A |   |
| <i>P76350</i> | W  | G | W | R | I  | P | F | L | F | S | I | V | L | V | L | G | A | L | W | V | R | N | G | M |
| <i>P0AEX3</i> | A  | L | R | E | W  | G | W | R | I | P | F | A | L | G | A | V | L | A | V | A | L | W | L |   |
| <i>Q5HRH0</i> | W  | G | W | R | I  | P | F | L | L | G | M | F | L | G | L | F | G | L | Y | L | R | R | K | L |
| <i>O51798</i> | M  | A | W | R | V  | A | F | W | S | G | I | P | A | L | I | V | L | F | I | R | R | H | V |   |
| <i>P0C0L7</i> | W  | G | W | R | I  | P | F | F | I | A | L | P | L | G | I | I | G | L | Y | L | R | H | A | L |
| <i>P37643</i> | W  | G | W | R | V  | P | F | I | F | S | A | V | L | V | I | I | G | L | Y | V | R | V | S | L |
| <i>P71369</i> | I  | G | W | R | G  | M | F | L | V | G | I | F | P | A | F | V | A | W | F | L | R | S | H | L |
| <i>P94131</i> | H  | G | W | R | V  | L | F | Y | V | A | I | I | P | V | L | M | A | V | L | M | H | F | F | V |
| <i>P11166</i> | D  | L | W | P | L  | L | S | I | I | F | I | P | A | L | L | Q | C | I | V | L | P | F | C |   |
| <i>P0AGF4</i> | D  | G | W | R | Y  | M | F | A | S | E | C | I | P | A | L | L | F | L | M | L | L | Y | T | V |
| <i>P11551</i> | L  | S | V | T | P  | Y | M | I | I | V | A | I | V | L | L | V | A | L | L | I | M | L | T |   |



# MFS TM8

TM8

|               | EC      |           | h       |         | IC         |
|---------------|---------|-----------|---------|---------|------------|
| <i>P08194</i> | ALDK    | SSWAYFLYE | VAGIPGT | LLCGWMS | SDK        |
| <i>P02920</i> | GTRVFG  | YVTTMGE   | LLNASIM | FFAPLI  | INR        |
| <i>P76350</i> | LF      | LNIGLLVGG | LSCLTIP | PCFAWL  | DRFGR      |
| <i>P0AEX3</i> | HANVAS  | GIMTAALF  | VFM     | LIQPLIG | ALSDK      |
| <i>Q5HRH0</i> | NGTT    | SIMITCIM  | VIMIP   | LALMFG  | RIADR      |
| <i>O51798</i> | QRQVAAG | S         | MIVTVF  | IMAFG   | SFCGFAVTAD |
| <i>P0C0L7</i> | SEDHG   | VLIIIAI   | MIGMLF  | VQ      | PVMGLLSDR  |
| <i>P37643</i> | PRNE    | VLMMLMA   | VIGFG   | VMVPVAG | LLADA      |
| <i>P71369</i> | SLTK    | SGLWT     | AVTVCG  | MMAGI   | WIFGQLADR  |
| <i>P94131</i> | KFKEM   | TAYMVG    | TYTAMIL | GKILAG  | FMA DK     |
| <i>P11166</i> | GVQQ    | PVYATIG   | SGIVNT  | AFTVVS  | SLFVVER    |
| <i>P0AGF4</i> | STDIA   | LQTIIVG   | VINLIFT | VLAIM   | TVDK       |
| <i>P11551</i> | TAGFA   | ANYLTGT   | MVCF    | IGRFTGT | WLISR      |

# MFS TM9

TM9

|               | IC |   | h |   | EC |   |   |   |   |   |   |   |   |   |   |   |   |   |   |   |   |
|---------------|----|---|---|---|----|---|---|---|---|---|---|---|---|---|---|---|---|---|---|---|---|
| <i>P08194</i> | R  | G | A | T | G  | V | F | F | M | L | V | T | I | A | I | V | W | M |   |   |   |
| <i>P02920</i> | G  | K | N | A | L  | L | L | A | G | T | I | M | S | V | R | I | I | G | S | S | F |
| <i>P76350</i> | -  | R | R | V | I  | T | G | T | L | I | G | T | L | S | A | F | P | F | F | M |   |
| <i>P0AEX3</i> | R  | R | T | S | M  | L | C | F | G | S | L | A | A | I | F | T | V | P | I | L | S |
| <i>Q5HRH0</i> | E  | K | K | V | F  | L | I | G | L | G | L | I | L | L | S | V | V | A | F | S |   |
| <i>O51798</i> | T  | L | I | L | S  | V | C | A | W | I | V | T | V | S | Y | M | L | L | P | L |   |
| <i>P0C0L7</i> | V  | L | L | G | S  | V | A | L | F | V | L | A | I | P | A | F | I | L | I | N | S |
| <i>P37643</i> | T  | K | S | M | V  | I | I | T | L | I | I | L | F | A | L | F | A | F | N | P |   |
| <i>P71369</i> | R  | K | P | S | F  | L | L | F | Q | L | G | A | V | I | S | I | V | W | S | Q |   |
| <i>P94131</i> | R  | R | F | T | Y  | A | F | G | A | I | G | T | A | I | F | L | P | L | I | V | F |
| <i>P11166</i> | G  | L | A | G | M  | A | G | C | A | I | L | M | T | I | A | L | A | L | L | E | Q |
| <i>P0AGF4</i> | R  | K | P | L | Q  | I | I | G | A | L | G | M | A | I | G | M | F | S | L | G | T |
| <i>P11551</i> | P  | H | K | V | L  | A | A | Y | A | L | I | A | M | A | L | C | L | I | S | A | F |

# MFS TM10

## TM10

|               | EC |   | h |   | IC |   |   |   |   |   |   |   |   |   |   |   |   |   |   |   |   |   |   |   |   |   |   |   |   |   |
|---------------|----|---|---|---|----|---|---|---|---|---|---|---|---|---|---|---|---|---|---|---|---|---|---|---|---|---|---|---|---|---|
| <i>P08194</i> | G  | N | P | T | V  | D | M | I | C | M | I | V | I | G | F | L | I | Y | G | P | V | M | L | I | G | L | H | A | L | E |
| <i>P02920</i> | A  | T | S | A | L  | E | V | V | I | L | K | T | L | H | M | F | E | V | P | F | L | L | V | G | C | F | K | Y | I | T |
| <i>P76350</i> | L  | E | A | Q | S  | I | F | W | I | V | F | F | S | I | M | L | A | N | I | A | H | D | M | V | V | C | V | Q | Q | P |
| <i>P0AEX3</i> | Y  | A | A | F | G  | L | V | M | C | A | L | L | I | V | S | F | Y | T | S | I | S | G | I | L | K | A | E | M | F | P |
| <i>Q5HRH0</i> | F  | F | V | S | I  | G | V | L | I | L | G | F | F | L | S | T | Y | E | A | T | M | P | G | S | L | P | T | M | F | Y |
| <i>O51798</i> | T  | L | T | A | I  | L | G | F | L | V | G | F | S | A | I | G | M | F | A | A | L | G | P | F | L | S | E | L | F | P |
| <i>P0C0L7</i> | -  | - | N | V | I  | G | L | I | F | A | G | L | L | M | L | A | V | I | L | N | C | F | T | G | V | M | A | S | T | L |
| <i>P37643</i> | I  | L | V | F | A  | F | L | L | L | G | L | S | L | M | G | L | T | F | G | P | M | G | A | L | L | P | E | L | F | P |
| <i>P71369</i> | D  | I | M | L | L  | A | G | A | F | L | G | M | F | V | N | G | M | L | G | G | Y | G | A | L | M | A | E | A | Y | P |
| <i>P94131</i> | D  | N | I | L | Y  | L | L | V | I | F | G | F | L | Y | G | I | P | Y | G | V | N | A | T | Y | M | T | E | S | F | P |
| <i>P11166</i> | M  | S | Y | L | S  | I | V | A | I | F | G | F | V | A | F | F | E | V | G | P | G | P | I | P | W | F | I | V | A | E |
| <i>P0AGF4</i> | G  | I | V | A | L  | L | S | M | L | F | Y | V | A | A | F | A | M | S | W | G | P | V | C | W | V | L | L | S | E | I |
| <i>P11551</i> | H  | V | G | L | I  | A | L | T | L | C | S | A | F | M | S | I | O | Y | P | T | I | F | S | L | G | I | K | N | L | G |

# MFS TM11

## TM11

|               | IC                  |                   | h        |  | EC |
|---------------|---------------------|-------------------|----------|--|----|
| <i>P08194</i> | AAGTAAGFTGLFGYLGG   | SVAAS             | SAIVGYTV |  |    |
| <i>P02920</i> | SATILVCFCKQLAMIFMS  | VLAGNMYE          |          |  |    |
| <i>P76350</i> | RYSGAGVGYQVASVGGG   | FTPIAAALIT        |          |  |    |
| <i>P0AEX3</i> | VRALGVGLSYAVANAIFGG | SAEYVALSLK        |          |  |    |
| <i>Q5HRH0</i> | RYRALAITFNVSVSLLGG  | TTPLIASYLVS       |          |  |    |
| <i>O51798</i> | VRTTCMGFAYNVGKSI    | GAGSVVGVGLST      |          |  |    |
| <i>P0C0L7</i> | IRYSALAAAFNISVLVAG  | LTPTLAAWLVE       |          |  |    |
| <i>P37643</i> | RYTGASFYNVASILGAS   | VAPYIAAWLQT       |          |  |    |
| <i>P71369</i> | ARATAQNVLFNIGRAVGG  | FGPVVVG           | SVVL     |  |    |
| <i>P94131</i> | IRGTAIGGAYNVGR      | LGAAIAPATIGF      | LAS      |  |    |
| <i>P11166</i> | AAIAVAGFSNWT        | SNFIVGMCFQYVEQLCG |          |  |    |
| <i>P0AGF4</i> | IRGKALAIAVAAQWLANY  | FVSWTFPMDK        |          |  |    |
| <i>P11551</i> | QDTKYGSSFIVMTIIGGG  | IVTPVMGFVSD       |          |  |    |

# MFS TM12

## TM12

|               | EC                           | h                | IC |
|---------------|------------------------------|------------------|----|
| <i>P08194</i> | WDGGFMVMIGG                  | SILAVILLIIVMIGEK |    |
| <i>P02920</i> | FQGAYLVLGLVALGFTLISVFTLSGPG  |                  |    |
| <i>P76350</i> | HSVAIYLLAGCLISAMTALLMKDSQRA  |                  |    |
| <i>P0AEX3</i> | ETAFFWYVTLMAVVAFLVSLMLHRKGK  |                  |    |
| <i>Q5HRH0</i> | PLTPAYYLTVISIIGFIVIALLLHKSTA |                  |    |
| <i>O51798</i> | ANAMGTFCLVAYAFVFGIMLLPETRG   |                  |    |
| <i>P0C0L7</i> | LMMPAYYLMVVAVVGLITGVTMKETAN  |                  |    |
| <i>P37643</i> | LGAVGLYLAAMAGLTLIALLLTHETRH  |                  |    |
| <i>P71369</i> | FQTAIALLAIIVVIDMLATIFLIPK    |                  |    |
| <i>P94131</i> | IGLGFVVMGAAYFICGVI PALFIKEKQ |                  |    |
| <i>P11166</i> | --YVFIIFTVLLVLFIFTYFKVPETK   |                  |    |
| <i>P0AGF4</i> | HFHNGFSYWIYGC MGVLAAFMWKFVP  |                  |    |
| <i>P11551</i> | IPTAELIPALCFAVIFIFARFRSQTAT  |                  |    |





# PNuC TM1

TM1

|               | EC |   | h |   | IC |   |   |   |   |   |   |   |   |   |   |   |   |   |   |   |   |
|---------------|----|---|---|---|----|---|---|---|---|---|---|---|---|---|---|---|---|---|---|---|---|
| <i>D6ZNI7</i> | D  | W | I | G | M  | I | C | S | L | T | G | I | I | C | V | I | F | V | S | E | G |
| <i>Q8NU75</i> | L  | W | R | E | I  | I | G | N | V | F | G | L | F | S | A | W | A | G | M | R | R |
| <i>Q8X953</i> | S  | W | I | E | A  | V | G | T | I | A | G | L | L | C | I | G | L | A | S | L | E |
| <i>O25877</i> | S  | F | I | N | L  | L | A | G | L | S | G | V | L | Y | A | F | F | A | G | E | R |
| <i>Q9CH61</i> | S  | I | I | T | L  | I | A | T | L | M | G | S | A | C | T | V | Y | M | M | I | G |
| <i>Q9CK00</i> | S  | I | L | G | M  | I | S | G | I | S | G | I | L | C | V | V | F | V | S | K | G |
| <i>P24520</i> | S  | W | I | E | A  | V | G | T | I | A | G | L | L | C | I | W | L | A | S | L | E |
| <i>D3QMT7</i> | S  | W | I | E | A  | V | G | T | I | A | G | L | L | C | I | G | L | A | S | L | E |
| <i>Q9ZJT8</i> | S  | F | I | N | L  | L | A | G | L | S | G | V | L | Y | A | F | F | A | G | E | R |
| <i>P0AFK2</i> | S  | W | I | E | A  | V | G | T | I | A | G | L | L | C | I | G | L | A | S | L | E |
| <i>D2ZZC1</i> | S  | W | L | A | S  | V | A | A | V | T | G | I | L | C | V | V | F | V | G | K | G |

# PNuC TM2

TM2

|               | IC | h |   | EC |   |   |   |   |   |   |   |   |   |   |   |   |   |   |   |   |
|---------------|----|---|---|----|---|---|---|---|---|---|---|---|---|---|---|---|---|---|---|---|
| <i>D6ZNI7</i> | S  | N | Y | L  | F | G | L | I | N | S | V | I | Y | L | I | L | A | L | O | K |
| <i>Q8NU75</i> | W  | A | W | P  | I | G | I | I | G | N | A | L | L | F | T | V | F | M | G | G |
| <i>Q8X953</i> | S  | N | Y | F  | F | G | L | I | N | V | T | L | F | G | I | I | F | F | Q | I |
| <i>O25877</i> | I  | C | F | V  | F | G | L | V | N | L | S | Y | A | V | V | A | Y | Q | W |   |
| <i>Q9CH61</i> | I  | N | G | L  | L | G | L | I | S | A | F | G | Y | I | I | N | W | T | A |   |
| <i>Q9CK00</i> | S  | N | Y | F  | F | G | L | I | F | A | Y | T | Y | F | Y | V | A | W | O | A |
| <i>P24520</i> | S  | N | Y | F  | F | G | L | V | N | V | T | L | F | A | I | I | F | F | Q | I |
| <i>D3QMT7</i> | S  | N | Y | F  | F | G | L | I | N | V | T | L | F | G | I | I | F | F | Q | I |
| <i>Q9ZJT8</i> | I  | C | F | I  | F | G | L | V | N | L | S | Y | A | V | V | A | Y | Q | W |   |
| <i>P0AFK2</i> | S  | N | Y | F  | F | G | L | I | N | V | T | L | F | G | I | I | F | F | Q | I |
| <i>D2ZZC1</i> | S  | N | Y | L  | F | G | L | I | S | V | S | L | V | A | Y | V | S | Y | T | F |



# PNuC TM4

TM4

|               | IC |   | h |   | EC |   |   |   |   |   |   |   |   |   |   |   |   |   |   |   |   |   |   |   |   |
|---------------|----|---|---|---|----|---|---|---|---|---|---|---|---|---|---|---|---|---|---|---|---|---|---|---|---|
| <i>D6ZNI7</i> | D  | G | K | G | W  | T | K | Y | L | S | I | S | V | L | W | L | A | F | G | F | I | Y | Q | S |   |
| <i>Q8NU75</i> | S  | T | K | E | R  | A | G | I | V | I | A | A | V | V | G | T | L | S | F | A | W | I | F | Q | A |
| <i>Q8X953</i> | K  | A | L | S | W  | L | A | V | C | V | S | I | G | L | M | T | V | F | I | N | P | V | F | A |   |
| <i>O25877</i> | K  | L | S | K | N  | W | R | F | I | L | I | L | G | V | G | V | L | T | C | V | S | A | L | F | F |
| <i>Q9CH61</i> | K  | T | K | G | W  | I | L | T | I | S | S | M | L | V | L | W | P | I | T | V | I | Y | T | K |   |
| <i>Q9CK00</i> | T  | L | K | G | W  | A | I | V | L | G | T | I | I | G | T | L | L | F | V | Q | A | L | N | A |   |
| <i>P24520</i> | K  | A | M | A | W  | L | A | I | C | V | I | A | I | G | L | M | T | R | Y | I | D | P | V | F | A |
| <i>D3QMT7</i> | K  | A | L | S | W  | L | A | V | C | V | S | I | G | L | M | T | V | F | I | N | P | V | F | A |   |
| <i>Q9ZJT8</i> | K  | L | P | K | N  | W | R | F | A | L | V | L | G | V | G | V | L | T | Y | A | S | A | L | F | F |
| <i>P0AFK2</i> | K  | A | L | S | W  | L | A | V | C | V | S | I | G | L | M | T | V | F | I | N | P | V | F | A |   |
| <i>D2ZZC1</i> | T  | V | R | Q | W  | L | L | V | V | A | A | S | V | V | G | T | S | V | I | E | W | L | H | H |   |

# PNuC TM5

TM5

|               | EC |   |   |   |   | h |   | IC |   |   |   |   |   |   |   |   |   |   |   |   |
|---------------|----|---|---|---|---|---|---|----|---|---|---|---|---|---|---|---|---|---|---|---|
| <i>D6ZNI7</i> | P  | Y | R | S | I | T | D | A  | T | N | G | V | G | Q | I | L | M | T | A |   |
| <i>Q8NU75</i> | P  | W | A | D | A | W | I | F  | V | G | S | I | L | A | T | Y | G | M | A | R |
| <i>Q8X953</i> | P  | F | W | D | S | C | M | M  | V | L | S | I | V | A | M | I | L | M | T | R |
| <i>O25877</i> | L  | W | A | E | S | F | N | F  | V | I | F | I | I | A | F | I | L | Q | V | L |
| <i>Q9CH61</i> | P  | L | W | D | A | I | T | L  | I | I | G | A | A | A | S | I | L | V | V | R |
| <i>Q9CK00</i> | T  | G | L | D | G | L | T | T  | V | I | V | V | V | A | Q | L | L | M | I | L |
| <i>P24520</i> | P  | F | W | D | S | C | M | M  | V | L | S | I | V | A | M | I | L | M | T | R |
| <i>D3QMT7</i> | P  | F | W | D | S | C | M | M  | V | L | S | I | V | A | M | I | L | M | T | R |
| <i>Q9ZJT8</i> | L  | W | A | E | S | F | N | F  | V | I | F | I | I | A | F | I | L | Q | V | L |
| <i>P0AFK2</i> | P  | F | W | D | S | C | M | M  | V | L | S | I | V | A | M | I | L | M | T | R |
| <i>D2ZZC1</i> | P  | T | L | D | G | V | T | V  | V | S | I | V | A | Q | V | L | M | I | L |   |

# PNuC TM6

TM6

|               | IC | h | EC |
|---------------|----|---|----|
| <i>D6ZNI7</i> | E  | Q | W  |
| <i>Q8NU75</i> | E  | F | W  |
| <i>Q8X953</i> | E  | N | W  |
| <i>Q25877</i> | E  | N | Y  |
| <i>Q9CH61</i> | D  | S | Y  |
| <i>Q9CK00</i> | E  | Q | W  |
| <i>P24520</i> | E  | N | W  |
| <i>D3QMT7</i> | E  | N | W  |
| <i>Q9ZJT8</i> | E  | N | Y  |
| <i>P0AFK2</i> | E  | N | W  |
| <i>D2ZZC1</i> | E  | Q | W  |







# SemiSweet TM2

TM2

|               | IC |   | h |   | EC |   |   |   |   |   |   |   |   |   |   |   |   |   |   |   |
|---------------|----|---|---|---|----|---|---|---|---|---|---|---|---|---|---|---|---|---|---|---|
| <i>P0DMV3</i> | V  | M | I | M | F  | L | T | G | V | I | S | W | I | A | Y | G | I | M | R |   |
| <i>B5YGD6</i> | L  | A | M | F | I  | F | M | A | I | G | I | T | L | W | F | F | Y | G | V | L |
| <i>B0SR19</i> | R  | N | M | I | M  | F | F | L | G | V | V | L | W | F | V | Y | G | I | L | R |
| <i>Q98RJ6</i> | P  | F | S | F | W  | I | L | H | F | S | F | S | I | W | L | F | Y | G | Y | L |
| <i>Q57574</i> | L  | A | F | V | I  | T | F | T | T | G | L | T | L | W | L | I | Y | G | I | L |
| <i>C3PPD0</i> | M  | P | A | F | T  | I | S | A | I | A | L | C | S | W | L | I | Y | G | I | L |
| <i>Q8DR88</i> | L  | G | M | Y | V  | M | Q | V | I | G | I | A | L | W | L | A | H | G | I | R |
| <i>Q8YYQ1</i> | F  | I | M | L | I  | F | F | N | T | G | I | F | L | W | L | I | Y | G | I | L |
| <i>Q9PRA3</i> | I  | S | M | F | I  | I | C | F | I | A | R | L | C | F | S | L | S | A | I | L |
| <i>Q9PRA4</i> | L  | T | F | L | I  | S | L | N | I | A | C | F | L | F | V | I | Y | S | I | L |

# SemiSweet TM3

TM3

|               | EC |   | h |   | IC |   |   |   |   |   |   |   |   |   |   |   |   |   |   |   |   |   |   |   |
|---------------|----|---|---|---|----|---|---|---|---|---|---|---|---|---|---|---|---|---|---|---|---|---|---|---|
| <i>P0DMV3</i> | V  | L | I | A | N  | I | V | T | L | F | L | A | A | P | V | L | V | I | T | L | I | N | R | R |
| <i>B5YGD6</i> | E  | I | P | V | I  | L | A | N | L | I | S | L | I | L | I | F | L | I | I | F | M | K | I | R |
| <i>B0SR19</i> | D  | L | P | I | I  | L | A | N | V | V | T | L | F | F | V | T | I | I | L | Y | Y | K | L | T |
| <i>Q98RJ6</i> | Y  | K | P | T | K  | K | W | W | I | Y | I | P | L | S | F | V | L | I | F | V | S | I | F |   |
| <i>Q57574</i> | D  | Y | P | I | I  | V | F | N | I | L | S | L | M | F | W | I | P | I | T | Y | L | K | I | R |
| <i>C3PPD0</i> | N  | T | P | I | I  | I | A | N | I | V | G | F | I | G | A | L | L | V | L | L | T | I | I | I |
| <i>Q8DR88</i> | D  | L | P | L | I  | L | A | N | S | V | S | F | L | L | S | G | I | I | L | F | Y | K | L | K |
| <i>Q8YYQ1</i> | Q  | L | P | V | I  | F | A | N | A | T | T | L | V | F | N | M | I | L | W | L | K | I | K |   |
| <i>Q9PRA3</i> | T  | L | P | V | L  | I | C | H | G | I | N | M | L | L | N | L | I | A | F | I | K | I | N |   |
| <i>Q9PRA4</i> | A  | L | P | L | C  | L | A | N | T | I | V | G | I | L | G | L | V | I | L | I | Y | K | V | K |

# Sweet TM1

|                   | TM1 |   |   |   |   |   |   |   |   |   |   |   |   |   |   |    |   |   |   |   |   |   |   |   |   |   |   |   |   |   |
|-------------------|-----|---|---|---|---|---|---|---|---|---|---|---|---|---|---|----|---|---|---|---|---|---|---|---|---|---|---|---|---|---|
|                   | EC  |   |   |   |   |   |   |   |   |   |   |   |   |   |   | IC |   |   |   |   |   |   |   |   |   |   |   |   |   |   |
|                   |     |   |   |   |   |   |   |   |   |   |   |   |   |   |   |    |   |   |   |   |   |   |   |   |   |   |   |   |   |   |
| <i>Q5N8J1</i>     | I   | S | C | F | A | A | G | L | A | G | N | I | F | A | L | A  | L | F | L | S | P | V | T | T | F | K | R | I | L | K |
| <i>Q8L9J7</i>     | I   | A | H | T | I | F | G | V | F | G | N | A | T | A | L | F  | L | F | L | A | P | S | I | T | F | K | R | I | I | K |
| <i>Q6L568</i>     | A   | V | R | N | V | G | I | I | G | N | L | I | S | F | G | L  | F | L | S | P | L | P | T | F | V | T | I | V | K |   |
| <i>Q19VE6</i>     | P   | A | V | T | L | S | G | V | A | G | N | I | S | F | L | V  | F | L | A | P | V | A | T | F | L | Q | V | Y | K |   |
| <i>Q2QR07</i>     | P   | W | A | F | A | F | G | L | L | G | N | L | I | S | F | T  | T | Y | L | A | P | I | P | T | F | Y | R | I | Y | K |
| <i>Q9FPN0</i>     | D   | L | S | F | I | F | G | L | L | G | N | I | V | S | F | M  | V | F | L | A | P | V | P | T | F | Y | K | I | Y | K |
| <i>Q9BRV3</i>     | G   | F | L | D | S | L | I | Y | G | A | C | V | V | F | T | L  | G | M | F | S | A | G | L | S | D | L | R | H | M | R |
| <i>B4NMK1</i>     | A   | Y | D | S | L | L | S | T | T | A | V | I | S | T | V | F  | Q | F | L | S | G | S | I | V | C | R | K | Y | I | Q |
| <i>D0N2J4</i>     | M   | A | A | I | L | G | M | L | R | V | L | T | T | V | A | A  | L | L | V | G | L | S | P | L | P | D | F | Y | R | I |
| <i>V9FTL5</i>     | M   | V | D | S | T | V | L | L | V | R | I | F | A | A | F | G  | A | L | A | L | I | C | S | P | S | I | L | M | R |   |
| <i>A0A075AWI5</i> | D   | F | L | L | G | Q | I | V | P | A | L | G | A | C | I | S  | I | F | L | F | L | S | P | M | K | A | F | M | V | H |
| <i>F4NY39</i>     | V   | M | N | H | V | L | P | A | L | G | V | A | F | A | I | S  | I | Y | L | S | P | F | T | H | V | W | K | S | L | K |
| <i>A8HVE3</i>     | F   | L | H | L | A | P | G | L | G | C | I | A | F | L | M | F  | V | S | P | L | K | T | V | L | Q | I | R | A |   |   |

# Sweet TM2

TM2

|                   | IC |   | h |   | EC |   |   |   |   |   |   |   |   |   |   |   |   |
|-------------------|----|---|---|---|----|---|---|---|---|---|---|---|---|---|---|---|---|
| <i>Q5N8J1</i>     | L  | P | Y | L | F  | S | L | L | N | C | L | I | C | L | W | Y | G |
| <i>Q8L9J7</i>     | I  | P | Y | P | M  | T | L | L | N | C | L | L | S | A | W | Y | G |
| <i>Q6L568</i>     | D  | P | Y | L | A  | T | F | L | N | C | A | L | W | V | F | Y | G |
| <i>Q19VE6</i>     | V  | P | Y | V | V  | A | L | F | S | S | V | L | W | I | F | Y | A |
| <i>Q2QR07</i>     | V  | P | Y | V | V  | A | L | F | S | A | M | L | W | I | F | Y | A |
| <i>Q9FPN0</i>     | Y  | M | V | A | L  | F | S | A | G | L | L | L | Y | Y | A | Y | L |
| <i>Q9BRV3</i>     | F  | L | P | F | L  | T | T | E | V | N | N | L | G | W | L | S | Y |
| <i>B4NMK1</i>     | L  | P | F | I | C  | G | F | L | S | C | S | F | W | L | R | Y | G |
| <i>D0N2J4</i>     | L  | P | I | T | L  | L | F | C | N | C | V | M | W | A | I | Y | G |
| <i>V9FTL5</i>     | I  | P | L | V | M  | L | A | I | N | S | H | V | W | M | M | Y | G |
| <i>A0A075AWI5</i> | L  | A | A | I | T  | M | I | L | N | C | L | S | W | I | F | Y | G |
| <i>F4NY39</i>     | M  | P | Y | P | W  | I | I | A | N | C | L | G | W | I | V | Y | G |
| <i>A8HVE3</i>     | L  | P | L | V | A  | I | I | A | N | C | A | A | W | L | I | Y | G |

# Sweet TM3

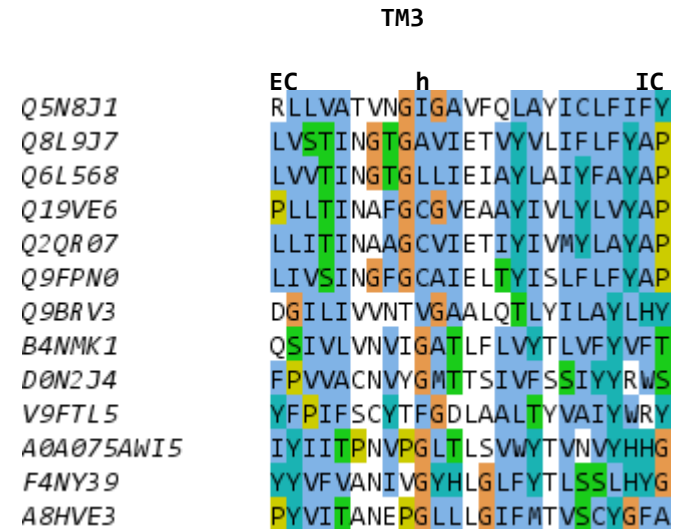

# Sweet TM4

TM4

|                   | IC       |   | h         |          | EC          |
|-------------------|----------|---|-----------|----------|-------------|
| <i>Q5N8J1</i>     | RKTRMKI  | I | GLLVLVVCG | FALV     | SHASVFFF    |
| <i>Q8L9J7</i>     | KKEKIKIF | G | IFSCVLA   | FATV     | ALVSLFAL    |
| <i>Q6L568</i>     | PKRCRML  | G | VLTVELVF  | LAAVAAG  | VLLGAH      |
| <i>Q19VE6</i>     | RARLR    | T | LAFFLLLD  | VAAFALIV | TTLYLV      |
| <i>Q2QR07</i>     | KAKVF    | T | TKILLLLN  | GVFGV    | ILLTLLLS    |
| <i>Q9FPN0</i>     | RKSKIFT  | G | WLMLEL    | GALGMV   | PITYLLA     |
| <i>Q9BRV3</i>     | CPKR     | V | LLQTAT    | LLGVLL   | LGYPWLLV    |
| <i>B4NMK1</i>     | INKRCY   | V | KQFALV    | LLILIG   | VIWYTNGLTA  |
| <i>D0N2J4</i>     | SVHKI    | W | SHAAYV    | LAAGTF   | YLILGSCGVTN |
| <i>V9FTL5</i>     | TEHRY    | V | ARVIAVA   | LIVIIIL  | SIYAILGGF   |
| <i>A0A075AWI5</i> | ANNPQR   | K | YYDAI     | LVLGIF   | LILLVDSAIAP |
| <i>F4NY39</i>     | KFR      | T | AAVIVL    | GSSFLV   | LSAFVFAILR  |
| <i>A8HVE3</i>     | PKAR     | D | VMLKAL    | MFFAVLL  | SAVGIAIALFI |

# Sweet TM5

TM5

|                   | EC                                |                          | h      |  | IC |
|-------------------|-----------------------------------|--------------------------|--------|--|----|
| <i>Q5N8J1</i>     | PLRQQFVGAVSMASLI                  | SMFASPLAVMGVVI           | RS     |  |    |
| <i>Q8L9J7</i>     | NGRKLFCGLAATVFSIIMYASPLSIMRLVVKTK |                          |        |  |    |
| <i>Q6L568</i>     | DKRSLIVGTLCVFFGTLMYAAPLTIKQVIATK  |                          |        |  |    |
| <i>Q19VE6</i>     | PHQVKFLG                          | SVCLAFSMAVFVAPLSIIFKVI   | KT     |  |    |
| <i>Q2QR07</i>     | EQRVSLGWVCVAFSVSVFVAPLSIIKRVI     | QSR                      |        |  |    |
| <i>Q9FPN0</i>     | SHRVMIVGWICAAINVAVFAAPLSIMRQVI    | KT                       |        |  |    |
| <i>Q9BRV3</i>     | EARLQQLGLFC                       | SVFTISMYLSPLADLAKVI      | QT     |  |    |
| <i>B4NMK1</i>     | KQMVQITGIVCCVTVCF                 | FAAPLTSLVHVI             | RV     |  |    |
| <i>D0N2J4</i>     | DQVAS                             | SFGFIAVAINIALYASPLAGM    | KKVIET |  |    |
| <i>V9FTL5</i>     | AQVAKT                            | MGYIGDATAVCLYAAPMEKLFQVL | KHK    |  |    |
| <i>A0A075AWI5</i> | AAAQTMAGYMCIIMLFFYISPLSTLANCVKEK  |                          |        |  |    |
| <i>F4NY39</i>     | QPSKTVLG                          | SVCVFILVIFYASPLSDLASVIR  | SR     |  |    |
| <i>A8HVE3</i>     | ETASKTAGYTAVFILLCYYGAPLSTMAEVL    | SR                       |        |  |    |

# Sweet TM6

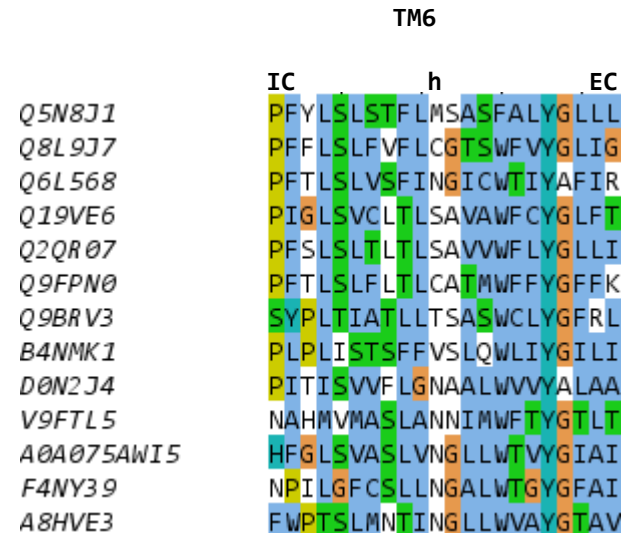



# Sweet TM7

TM7

|                   | EC                          | h | IC |
|-------------------|-----------------------------|---|----|
| <i>Q5N8J1</i>     | DFFIYFPNGLGLILGAMQLALYAYS   |   |    |
| <i>Q8L9J7</i>     | DPFVAIPNGFGCALGTLQLILYFIYC  |   |    |
| <i>Q6L568</i>     | DILITIPNGMGLLGAAQLILYFCYY   |   |    |
| <i>Q19VE6</i>     | DPYVMYPNVGGFFFSCVQMGLYFWYR  |   |    |
| <i>Q2QR07</i>     | DKYVALPNILGFTFGVVQMGLYVFYM  |   |    |
| <i>Q9FPN0</i>     | DFYIAFPNILGFLGIVQMLLYFVYK   |   |    |
| <i>Q9BRV3</i>     | DPYIMVSNFPGIVTSFIRFWLFWKYP  |   |    |
| <i>B4NMK1</i>     | DSFIQIPNFLGCILSLLQLSLFVIYP  |   |    |
| <i>D0N2J4</i>     | DVFVMVPNMLGMILCAAQVALYVKYR  |   |    |
| <i>V9FTL5</i>     | NWIIIAPNILFIALNSSTLVLCIVFN  |   |    |
| <i>A0A075AWI5</i> | DAFVYGPNFVGLSASVQLLLKFIYR   |   |    |
| <i>F4NY39</i>     | DPFIWAPNVVGVVLSIVQLFLCF LFR |   |    |
| <i>A8HVE3</i>     | DPFIAPNAIGAAGVIOIGLINIYP    |   |    |

# Tric TM1

**TM1**

|               | <b>EC</b> |   | <b>h</b> |   |   |   |   |   |   | <b>IC</b> |   |   |   |   |   |   |   |   |   |
|---------------|-----------|---|----------|---|---|---|---|---|---|-----------|---|---|---|---|---|---|---|---|---|
| <i>Q981D4</i> | L         | N | I        | G | I | A | F | T | I | S         | G | S | L | K | G | T | N |   |   |
| <i>Q9NA73</i> | P         | Y | F        | D | A | A | H | Y | V | L         | T | C | L | S | V | R | H | D | L |
| <i>Q9NA75</i> | P         | Y | F        | D | V | A | H | Y | L | L         | M | I | I | E | V | R | D | D | L |
| <i>A7SYB0</i> | P         | V | L        | Q | C | V | H | F | T | I         | V | S | L | K | L | R | M | K | L |
| <i>B4L9M1</i> | I         | V | F        | R | G | L | H | H | A | F         | I | A | V | Q | L | R | D | E | L |
| <i>B4LI23</i> | I         | L | F        | R | S | M | H | Y | A | F         | I | A | L | Q | L | R | D | E | L |
| <i>C3XU22</i> | P         | L | F        | E | I | A | H | Y | I | L         | M | C | Q | A | V | R | S | D | S |
| <i>C3XU25</i> | P         | V | F        | N | A | C | H | Y | T | L         | M | I | L | T | T | R | Y | D | T |
| <i>W5LC18</i> | P         | V | F        | D | V | A | Y | I | V | S         | I | L | Y | L | K | Y | E | P |   |
| <i>W4YLG9</i> | P         | F | F        | D | V | A | H | I | M | M         | I | L | A | L | R | N | D | A |   |
| <i>B4J0T3</i> | I         | L | F        | R | L | M | D | Y | A | F         | V | A | L | Q | L | R | H | E | L |

# Tric TM2

TM2

|               | IC |   | h |   | EC |   |   |   |   |   |   |   |   |   |   |   |   |   |   |   |   |   |   |   |
|---------------|----|---|---|---|----|---|---|---|---|---|---|---|---|---|---|---|---|---|---|---|---|---|---|---|
| <i>Q981D4</i> | I  | F | G | V | V  | T | L | G | V | I | T | S | Y | A | G | G | I | A | D | I | L | L | G |   |
| <i>Q9NA73</i> | P  | F | S | C | W  | L | S | C | M | L | M | S | F | A | G | S | F | L | S | C | F | L | L | G |
| <i>Q9NA75</i> | P  | L | S | C | W  | L | S | S | M | L | M | C | F | A | D | A | F | L | A | N | F | L | L | G |
| <i>A7SYB0</i> | P  | L | A | C | W  | I | S | A | V | I | S | N | F | A | G | S | F | L | I | S | F | F | L | G |
| <i>B4L9M1</i> | P  | F | T | L | W  | L | T | H | I | L | L | S | Y | A | G | D | I | L | V | S | L | L | L | G |
| <i>B4LI23</i> | P  | F | V | L | W  | L | T | H | I | L | V | S | Y | S | G | D | I | L | V | N | L | L | L | G |
| <i>C3XU22</i> | P  | L | A | N | W  | V | C | C | M | L | M | C | S | A | G | G | F | I | S | S | L | L | L | G |
| <i>C3XU25</i> | P  | L | A | N | W  | V | A | S | M | I | A | C | F | G | G | Y | I | L | A | D | L | L | L | G |
| <i>W5LC18</i> | P  | V | A | S | W  | L | C | A | M | L | Y | C | F | G | S | Y | I | L | A | D | I | M | L | G |
| <i>W4YLG9</i> | P  | L | A | C | W  | L | C | S | M | L | S | C | F | A | G | Y | I | L | S | N | A | L | L | G |
| <i>B4I0T3</i> | P  | E | V | L | W  | I | T | N | I | L | V | T | Y | A | G | F | T | L | V | N | M | L | L | G |

# Tric TM3

TM3

|               | EC |   | h |   | IC |   |   |   |   |   |   |   |   |   |   |
|---------------|----|---|---|---|----|---|---|---|---|---|---|---|---|---|---|
| <i>Q981D4</i> | L  | N | L | L | S  | V | G | I | S | I | F | V | F | Y | F |
| <i>Q9NA73</i> | H  | A | D | I | L  | L | G | S | I | V | W | L | V | F | Y |
| <i>Q9NA75</i> | H  | D | I | I | L  | A | T | I | I | W | L | V | F | Y | A |
| <i>A7SYB0</i> | V  | R | A | V | A  | A | M | T | T | I | W | L | V | F | Y |
| <i>B4L9M1</i> | A  | Q | D | V | A  | L | C | T | A | A | W | I | V | F | Y |
| <i>B4LI23</i> | Y  | H | D | V | M  | L | S | T | F | A | W | I | I | F | Y |
| <i>C3XU22</i> | T  | P | N | V | L  | L | S | S | A | I | W | L | E | F | Y |
| <i>C3XU25</i> | P  | E | D | V | V  | L | A | S | A | I | W | L | L | F | Y |
| <i>W5LC18</i> | N  | S | D | I | L  | L | A | S | A | V | W | L | I | F | F |
| <i>W4YLG9</i> | H  | S | K | I | G  | T | A | T | I | V | W | M | I | F | Y |
| <i>B4J0T3</i> | V  | Q | D | I | L  | L | C | S | A | A | W | L | I | F | Y |

# Tric TM4

TM4

|               | IC |   | h |   |   |   |   |   |   |   |   |   |   |   |   |   |   |   |   | EC |   |   |   |   |   |   |   |   |   |   |   |
|---------------|----|---|---|---|---|---|---|---|---|---|---|---|---|---|---|---|---|---|---|----|---|---|---|---|---|---|---|---|---|---|---|
| <i>Q981D4</i> | N  | P | I | K | M | I | I | A | I | S | D | A | V | G | L | S | T | F | A | T  | L | G | A | S | L | A | S | Y | G |   |   |
| <i>Q9NA73</i> | F  | P | V | K | L | G | L | S | V | L | K | E | V | Q | R | T | H | K | I | A  | A | G | V | K | H | A | V | R | I | Y |   |
| <i>Q9NA75</i> | T  | P | V | K | C | V | L | A | V | M | K | E | V | K | R | A | Y | K | V | S  | H | G | V | S | H | A | A | K | L | Y |   |
| <i>A7SYB0</i> | Q  | P | A | W | L | S | L | V | V | L | K | E | A | H | R | A | K | A | I | L  | G | G | V | S | M | G | L | E | H | Y |   |
| <i>B4L9M1</i> | A  | A | C | R | C | L | I | A | P | V | T | A | L | N | Q | V | L | H | I | E  | R | G | V | Q | L | A | T | K | T | Y |   |
| <i>B4LI23</i> | T  | P | F | R | C | L | A | T | P | V | A | A | L | S | Q | V | L | H | I | E  | R | G | V | H | L | A | S | K | V | Y |   |
| <i>C3XU22</i> | L  | P | I | K | L | V | V | S | L | K | E | I | R | R | A | H | K | V | P | D  | G | I | A | T | A | A | K | V | H |   |   |
| <i>C3XU25</i> | L  | P | L | K | L | V | I | T | A | L | K | E | T | A | R | V | R | K | L | V  | A | G | I | G | A | A | A | K | V | Y |   |
| <i>W5LC18</i> | L  | P | I | K | L | V | L | V | A | M | K | E | V | V | R | T | R | K | I | A  | A | G | V | H | A | H | H | A | Y |   |   |
| <i>W4YL69</i> | F  | P | G | K | L | V | I | G | P | M | K | E | A | V | R | A | R | K | V | G  | L | G | V | L | Q | A | A | Q | V | Y |   |
| <i>B4J0T3</i> | V  | L | F | R | L | L | A | A | P | V | T | A | I | S | I | Q | I | L | H | I  | E | R | G | V | Q | L | A | V | K | M | Y |

# Tric TM5

TM5

|               | EC |   | h |   | IC |   |   |   |   |   |   |   |   |   |   |   |   |   |   |   |   |   |   |   |   |   |   |
|---------------|----|---|---|---|----|---|---|---|---|---|---|---|---|---|---|---|---|---|---|---|---|---|---|---|---|---|---|
| <i>Q981D4</i> | N  | P | I | S | V  | G | L | I | A | I | V | G | T | G | G | G | V | I | R | D | V | L | V | N | E | I |   |
| <i>Q9NA73</i> | S  | Y | L | V | Q  | I | L | V | G | V | A | K | G | A | G | S | G | V | K | I | V | E | Q | L | A | R |   |
| <i>Q9NA75</i> | S  | Y | I | V | Q  | V | L | V | G | T | A | K | G | A | G | S | G | I | V | R | T | L | E | Q | L | V | R |
| <i>A7SYB0</i> | D  | L | L | V | V  | L | V | G | I | F | K | G | A | G | A | L | L | V | P | V | A | A | V | V | Q |   |   |
| <i>B4L9M1</i> | A  | T | L | P | I  | L | I | I | G | T | V | I | G | S | G | A | E | F | L | K | P | V | A | A | L | L | I |
| <i>B4LI23</i> | S  | L | V | P | V  | I | I | I | G | T | V | I | G | S | G | A | E | F | L | K | P | V | A | A | L | L | I |
| <i>C3XU22</i> | G  | Y | V | A | H  | V | V | I | A | C | V | K | G | A | G | S | G | F | M | L | N | F | R | L | V | R |   |
| <i>C3XU25</i> | S  | L | L | A | Q  | V | I | V | G | V | A | K | A | C | G | N | E | F | L | L | N | F | E | Q | A | V | R |
| <i>W5LC18</i> | G  | W | F | I | M  | V | I | T | G | Y | V | K | G | S | G | V | A | L | M | S | N | F | E | Q | L | L | R |
| <i>W4YLG9</i> | G  | F | I | M | V  | I | I | G | T | V | R | G | S | G | S | A | F | M | R | F | F | E | R | V | L | R |   |
| <i>B4J0T3</i> | A  | M | V | P | I  | L | I | V | G | T | V | I | G | S | G | A | E | F | L | K | P | V | A | A | L | F | I |

# Tric TM6

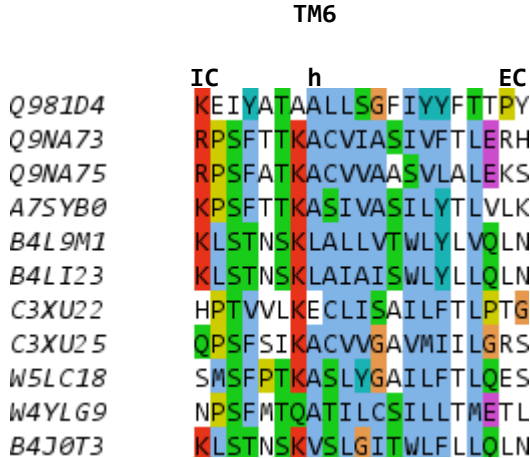

# Tric TM7

TM7

|               | EC |   | h |   | IC |   |   |   |   |   |   |   |   |   |   |   |   |   |   |   |   |   |   |   |
|---------------|----|---|---|---|----|---|---|---|---|---|---|---|---|---|---|---|---|---|---|---|---|---|---|---|
| <i>Q981D4</i> | S  | L | F | V | A  | F | L | G | S | F | L | L | R | I | L | S | I | K | Y | N | F | N | L | P |
| <i>Q9NA73</i> | P  | H | D | L | V  | L | C | V | G | F | F | I | Y | F | K | L | A | S | L | C | L | S |   |   |
| <i>Q9NA75</i> | P  | H | D | L | V  | L | V | I | V | G | F | F | V | F | K | L | S | A | V | I | L | H |   |   |
| <i>A7SYB0</i> | S  | T | E | C | L  | C | F | G | V | F | L | V | F | A | L | I | K | V | S | L | H | V | M | D |
| <i>B4L9M1</i> | R  | R | C | L | Q  | L | Y | V | L | L | A | L | I | F | R | I | L | A | V | F | Y | R |   |   |
| <i>B4LI23</i> | S  | R | C | L | Q  | L | Y | A | L | L | A | L | M | C | F | K | F | L | A | L | F | Y | R |   |
| <i>C3XU22</i> | N  | Q | D | L | L  | L | L | T | G | I | A | M | V | I | K | V | T | L | L | T | N |   |   |   |
| <i>C3XU25</i> | S  | Q | E | M | V  | L | A | V | S | L | W | L | I | S | V | A | S | M | K | A | F | H |   |   |
| <i>W5LC18</i> | S  | K | S | T | L  | I | C | I | F | T | L | F | M | A | T | S | K | V | I | M | T | A | R | H |
| <i>W4YL69</i> | D  | A | P | E | L  | M | L | M | L | T | L | L | V | G | Y | K | M | A | S | V | V | F | K |   |
| <i>B4J0T3</i> | G  | K | N | Q | L  | Q | L | Y | V | L | F | M | L | M | C | F | K | Y | M | V | L | F | Y | R |
