# Supplementary material for: Pseudo-Symmetric Assembly of Protodomains as a Common Denominator in the Evolution of Polytopic Helical Membrane Proteins
Source: PubMed Central journal article supplement (PMC7162841; doi:10.1007/s00239-020-09934-4), 2020-03-18
Supplement: 239_2020_9934_MOESM3_ESM.pdf [file 239_2020_9934_MOESM3_ESM.pdf]

**GPCRs**

| <b>PDB</b> | <b>Uniprot</b> | <b>use</b> |
|------------|----------------|------------|
| 4PHU       | O14842         | +          |
| 4ZJC       | O43613         | +          |
| 2RH1       | P07550         | +          |
| 4ZWJ       | P08100         | +          |
| 3UON       | P08172         | +          |
| 5DSG       | P08173         | +          |
| 5XCV       | P11229         | +          |
| 4XES       | P20789         | +          |
| 3V2Y       | P21453         | +          |
| 5U09       | P21554         | +          |
| 5GLH       | P24530         | +          |
| 2LNL       | P25024         | +          |
| 3VW7       | P25116         | +          |
| 4IAR       | P28222         | +          |
| 5EML       | P29274         | +          |
| 5UEN       | P30542         | +          |
| 4K5Y       | P34998         | +          |
| 3RZE       | P35367         | +          |
| 3PBL       | P35462         | +          |
| 4N6H       | P41143         | +          |
| 4DJH       | P41145         | +          |
| 4EA3       | P41146         | +          |
| 4OO9       | P41594         | +          |
| 5T1A       | P41597         | +          |
| 5VEW       | P43220         | +          |
| 5EE7       | P47871         | +          |
| 4XNV       | P47900         | +          |
| 5UNG       | P50052         | +          |
| 4MBS       | P51681         | +          |
| 5LWE       | P51686         | +          |
| 5NDD       | P55085         | +          |
| 3ODU       | P61073         | +          |
| 4OR2       | Q13255         | +          |
| 4Z34       | Q92633         | +          |
| 4JKV       | Q99835         | +          |
| 4PXZ       | Q9H244         | +          |

**CDD Link**

NONE, S2Table.csv was used from (Cvacek et al. 2016):

[http://www.csun.edu/gpcrs/datas/gross\\_paper/S2Table.csv](http://www.csun.edu/gpcrs/datas/gross_paper/S2Table.csv)

## Aquaporins

| <b>PDB</b> | <b>Uniprot</b> | <b>Use</b> | <b>gi #</b> |
|------------|----------------|------------|-------------|
| 1FQY       | P29972         | -          | 14278358    |
| 1FX8       | P0AERO         | -          | 21466058    |
| 1H6I       | P29972         | +          | 14278358    |
| 1IH5       | P29972         | -          | 14278358    |
| 1J4N       | P47865         | -          | NONE        |
| 1LDA       | P0AERO         | -          | 21466058    |
| 1LDF       | P0AERO         | +          | 21466058    |
| 1LDI       | P0AERO         | -          | 21466058    |
| 1RC2       | P60844         | -          | NONE        |
| 1SOR       | Q6J8I9         | -          | NONE        |
| 1YMG       | P06624         | -          | NONE        |
| 1Z98       | Q41372         | -          | NONE        |
| 2ABM       | P60844         | -          | NONE        |
| 2B5F       | Q41372         | -          | NONE        |
| 2B6O       | Q6J8I9         | +          | NONE        |
| 2B6P       | Q6J8I9         | -          | NONE        |
| 2C32       | P06624         | -          | NONE        |
| 2D57       | P47863         | -          | NONE        |
| 2EVU       | Q9C4Z5         | -          | NONE        |
| 2F2B       | Q9C4Z5         | +          | NONE        |
| 2O9D       | P60844         | -          | NONE        |
| 2O9E       | P60844         | -          | NONE        |
| 2O9F       | P60844         | -          | NONE        |
| 2O9G       | P60844         | +          | NONE        |
| 2W1P       | F2QVG4         | -          | NONE        |
| 2W2E       | F2QVG4         | -          | NONE        |
| 2ZZ9       | P47863         | -          | NONE        |
| 3C02       | Q8WPZ6         | +          | NONE        |
| 3CLL       | Q41372         | -          | NONE        |
| 3CN5       | Q41372         | +          | NONE        |
| 3CN6       | Q41372         | -          | NONE        |
| 3D9S       | P55064         | +          | NONE        |
| 3GD8       | P55087         | +          | NONE        |
| 3IYZ       | P47863         | -          | NONE        |
| 3J41       | Q6J8I9         | -          | NONE        |
| 3LLQ       | Q8UJW4         | +          | NONE        |
| 3M9I       | Q6J8I9         | -          | NONE        |
| 3NE2       | O28846         | +          | NONE        |
| 3NK5       | P60844         | -          | NONE        |
| 3NKA       | P60844         | -          | NONE        |
| 3NKC       | P60844         | -          | NONE        |
| 3ZOJ       | F2QVG4         | +          | NONE        |
| 4CSK       | P29972         | -          | 14278358    |
| 4IA4       | Q41372         | -          | NONE        |
| 4JC6       | Q41372         | -          | NONE        |

|      |        |   |           |
|------|--------|---|-----------|
| 4NEF | P41181 | + | 618855042 |
| 4OJ2 | P41181 | - | 618855042 |
| 5BN2 | F2QVG4 | - | NONE      |
| 5C5X | P55064 | - | NONE      |
| 5DYE | P55064 | - | NONE      |
| 5I32 | Q41951 | + | NONE      |
| NONE | P23645 | + | 71153495  |
| NONE | P23900 | + | 1706896   |
| NONE | P06624 | + | 85544350  |
| NONE | Q08451 | + | 586102    |
| NONE | P43286 | + | 1175013   |
| NONE | P25818 | + | 138560    |
| NONE | P26587 | + | 135858    |
| NONE | P08995 | + | 1352509   |
| NONE | O24389 | + | 1518057   |

**CDD Link:**

<https://www.ncbi.nlm.nih.gov/Structure/cdd/cddsrv.cgi?uid=321252>

**FOCA**

| <b>PDB</b> | <b>Uniprot</b> | <b>Use</b> | <b>gi#</b> |
|------------|----------------|------------|------------|
| 4FC4       | E8XEH9         | +          | NONE       |
| 3TDP       | Q186B7         | +          | NONE       |
| 3Q7K       | Q7CQU0         | +          | NONE       |
| 3KLY       | Q9KRE7         | +          | NONE       |
| 3KCU       | P0AC25         | +          | NONE       |
| NONE       | P38750         | +          | 731592     |
| NONE       | Q8XCN1         | +          | 156354448  |
| NONE       | 0A1Q4GXT       | +          | 15927981   |
| NONE       | Q8DPM4         | +          | 15901077   |
| NONE       | Q8ZNA4         | +          | 16765720   |
| NONE       | P37327         | +          | 586613     |
| NONE       | Q92E59         | +          | 16799677   |
| NONE       | W8U1Z5         | +          | 15926006   |

**CDD Link**

<https://www.ncbi.nlm.nih.gov/Structure/cdd/cddsrv.cgi?uid=COG2116&islf=1>

**PNuC**

| <b>PDB</b> | <b>Uniprot</b> | <b>Use</b> | <b>gi #</b> |
|------------|----------------|------------|-------------|
| 4QTN       | D2ZZC1         | +          | NONE        |
| NONE       | D6ZNI7         | +          | 15901687    |
| NONE       | Q8NU75         | +          | 19551314    |
| NONE       | Q8X953         | +          | 15830033    |
| NONE       | O25877         | +          | 15645903    |
| NONE       | Q9CH61         | +          | 15672860    |
| NONE       | Q9I2E6         | +          | 15597154    |
| NONE       | Q9CK00         | +          | 15603703    |
| NONE       | P24520         | +          | 20141705    |
| NONE       | D3QMT7         | +          | 15800460    |
| NONE       | Q9ZJT8         | +          | 15612275    |
| NONE       | POAFK2         | +          | 2507102     |

CDD Link

<https://www.ncbi.nlm.nih.gov/Structure/cdd/cddsrv.cgi?uid=COG3201&islf=1>

| TRiC | PDB  | Uniprot | Use | gi #      |                                                    |
|------|------|---------|-----|-----------|----------------------------------------------------|
|      | 5WTR | Q981D4  | +   | NONE      |                                                    |
|      | 5H35 | Q981D4  | -   | NONE      | Not used as better resolution structure available. |
|      | 5EIK | Q9NA73  | +   | 75023742  |                                                    |
|      | 5EGI | Q9NA75  | +   | NONE      |                                                    |
|      | NONE | A7SYB0  | +   | 156354448 |                                                    |
|      | NONE | A1X7VA  | -   | 761906102 |                                                    |
|      | NONE | B4L9M1  | +   | 195135689 |                                                    |
|      | NONE | B4LI23  | +   | 968115624 |                                                    |
|      | NONE | C3XU22  | +   | 260834779 |                                                    |
|      | NONE | C3XU25  | +   | 260834785 |                                                    |
|      | NONE | W5LC18  | +   | 597742168 |                                                    |
|      | NONE | W4YLG9  | +   | 390366097 |                                                    |
|      | NONE | B4J0T3  | +   | 195011963 |                                                    |

#### CDD Link

<https://www.ncbi.nlm.nih.gov/Structure/cdd/cddsrv.cgi?uid=pfam05197&islf=1>

### Semi-SWEET

| <b>PDB</b> | <b>Uniprot</b> | <b>Use</b> | <b>gi #</b> |
|------------|----------------|------------|-------------|
| 5UHS       | B0SR19         | -          | NONE        |
| 5UHQ       | B0SR19         | -          | NONE        |
| 4X5N       | P0DMV3         | -          | NONE        |
| 4X5M       | P0DMV3         | +          | NONE        |
| 4RNG       | B5YGD6         | +          | NONE        |
| 4QNC       | B0SR19         | +          | NONE        |
| NONE       | Q98RJ6         | +          | 15828483    |
| NONE       | Q57574         | +          | 2495803     |
| NONE       | C3PPD0         | +          | 15892952    |
| NONE       | Q8DR88         | +          | 15900237    |
| NONE       | Q8YYQ1         | +          | 14195404    |
| NONE       | Q9PRA3         | +          | 14195403    |
| NONE       | Q9PRA4         | +          | 17228290    |

### CDD Link

<https://www.ncbi.nlm.nih.gov/Structure/cdd/cddsrv.cgi?uid=COG4095&islf=1>

**SWEET**

| <b>PDB</b> | <b>Uniprot</b> | <b>Use</b> |
|------------|----------------|------------|
| 5CTG       | Q5N8J1         | +          |
| 5CTH       | Q5N8J1         | -          |
| NONE       | Q8L9J7         | +          |
| NONE       | Q6L568         | +          |
| NONE       | Q19VE6         | +          |
| NONE       | Q2QR07         | +          |
| NONE       | Q9FPN0         | +          |
| NONE       | Q9BRV3         | +          |
| NONE       | Q9XX26         | +          |
| NONE       | O45102         | +          |
| NONE       | B4NMK1         | +          |
| NONE       | D0N2J4         | +          |
| NONE       | V9FTL5         | +          |
| NONE       | .0A075AWI      | +          |
| NONE       | F4NY39         | +          |
| NONE       | A8HVE3         | +          |

**CDD Link**

<https://www.ncbi.nlm.nih.gov/Structure/cdd/cddsrv.cgi?uid=pfam03083&islf=1>



MFS

| <b>PDB</b> | <b>Uniprot</b> | <b>Use</b> | <b>gi #</b> |
|------------|----------------|------------|-------------|
| 4PYP       | P11166         | -          | NONE        |
| 5EGQ       | P11166         | -          | NONE        |
| 5EQH       | P11166         | +          | NONE        |
| 5EQI       | P11166         | -          | NONE        |
| 4GBY       | P0AGF4         | +          | NONE        |
| 4GBZ       | P0AGF4         | -          | NONE        |
| 4GCO       | P0AGF4         | -          | NONE        |
| 4JA3       | P0AGF4         | -          | NONE        |
| 4JA4       | P0AGF4         | -          | NONE        |
| 4QIQ       | P0AGF4         | -          | NONE        |
| 3Q7P       | P11551         | -          | NONE        |
| 3O7Q       | P11551         | +          | NONE        |
| 1PW4       | P08194         | +          | 34810882    |
| 1PV6       | P02920         | -          | 34810676    |
| 2FCP       | P02920         | -          | 34810676    |
| 2CFQ       | P02920         | +          | 34810676    |
| 2V8N       | P02920         | -          | 34810676    |
| 2Y5Y       | P02920         | -          | 34810676    |
| 4ZXR       | P02920         | -          | 34810676    |
| 5GXB       | P02920         | -          | 34810676    |
| NONE       | P76350         | +          | 2500934     |
| NONE       | P0AEX3         | +          | 84029499    |
| NONE       | Q5HRH0         | +          | 81174989    |
| NONE       | O51798         | +          | 7387890     |
| NONE       | P0COL7         | +          | 81171069    |
| NONE       | P37643         | +          | 586685      |
| NONE       | P71369         | +          | 7388456     |
| NONE       | P94131         | +          | 7387918     |

**CDD Link**

<https://www.ncbi.nlm.nih.gov/Structure/cdd/cddsrv.cgi?uid=cd06174#sealign>

**ACHA7**

| <b>PDB</b> | <b>Uniprot</b> | <b>Use</b> | <b>gi #</b> |
|------------|----------------|------------|-------------|
| 2MAW       | P36544         | -          | NONE        |
| 5AFH       | P36544         | -          | NONE        |
| 5AFJ       | P36544         | -          | NONE        |
| 5AFK       | P36544         | -          | NONE        |
| 5AFL       | P36544         | -          | NONE        |
| 5AFM       | P36544         | -          | NONE        |
| 5AFN       | P36544         | +          | NONE        |
| 4PIR       | P23979         | +          | 672885916   |
| NONE       | P28476         | +          | 410516956   |
| NONE       | P24046         | +          | 223590210   |
| NONE       | P26714         | +          | 120781      |
| NONE       | P19019         | +          | 120772      |
| NONE       | P24045         | +          | 120775      |
| NONE       | P08220         | +          | 120766      |
| NONE       | P25123         | +          | 635377460   |
| NONE       | P22933         | +          | 120792      |
| NONE       | L8IEJ2         | +          | 440904075   |

**CDD Link**

<https://www.ncbi.nlm.nih.gov/Structure/cdd/cddsrv.cgi?uid=308533>
